# Supplementary material for: Three-dimensional topology of the SMC2/SMC4 subcomplex from chicken condensin I revealed by cross-linking and molecular modelling
Source: PubMed Central journal article supplement (PMC4345284; doi:10.1098/rsob.150005), 2015-02-25
Supplement: rsob150005supp2.pdf [file rsob150005supp2.pdf]

**A** Map of cross-links specific for band iii (cross-links also seen in band i not shown)

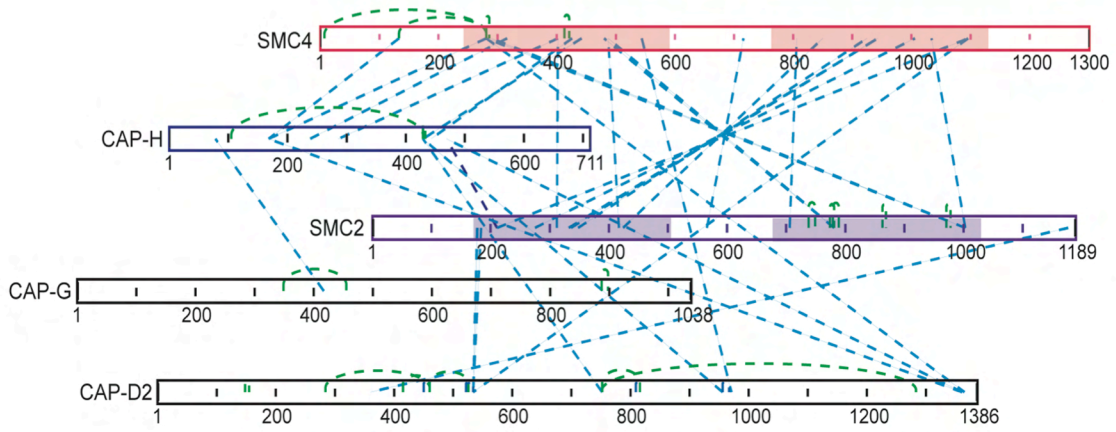

**B**

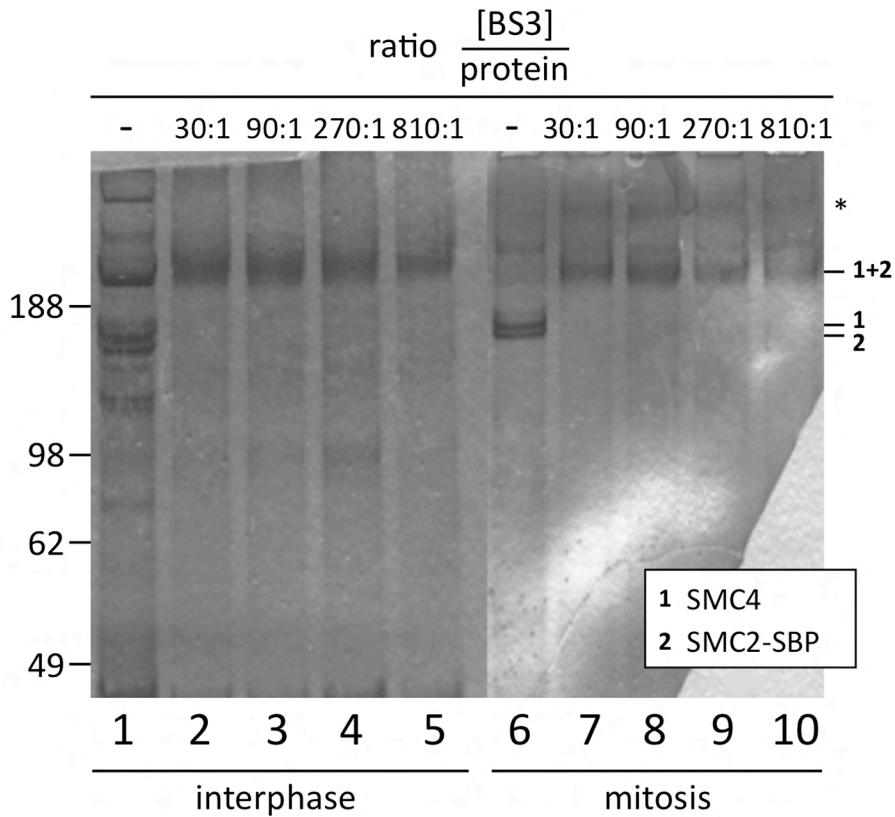

**C** SMC2/SMC4 cross-links displayed on a topological representation of the complex

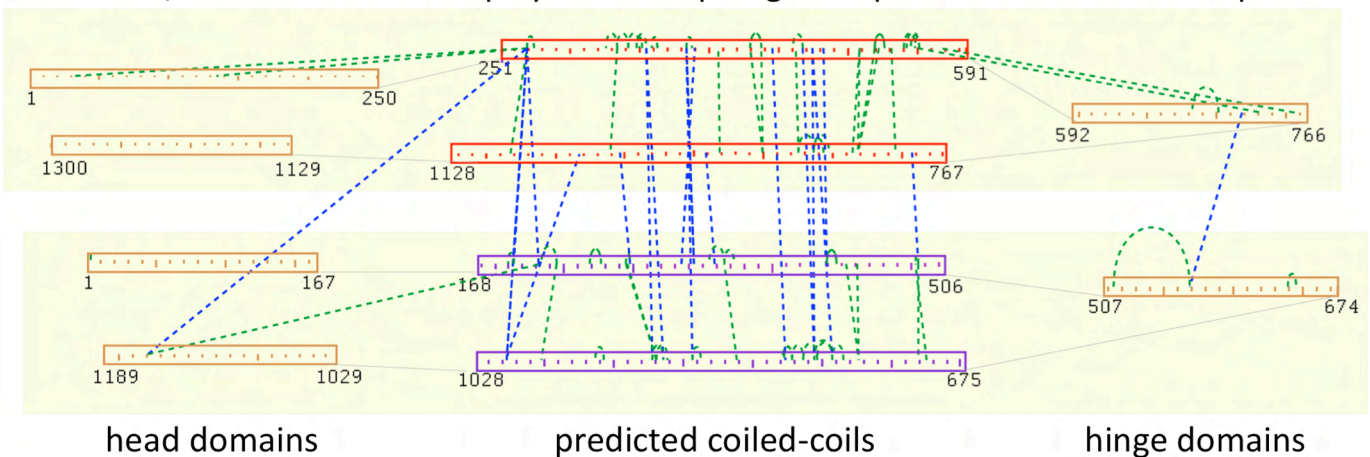

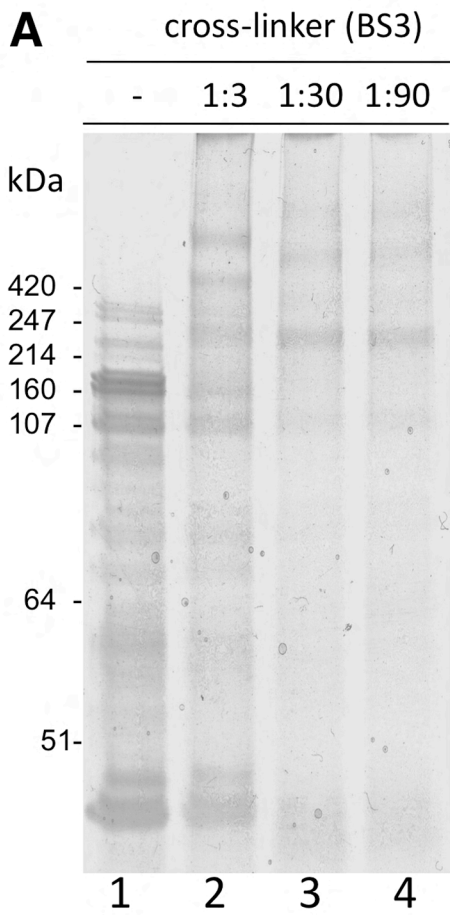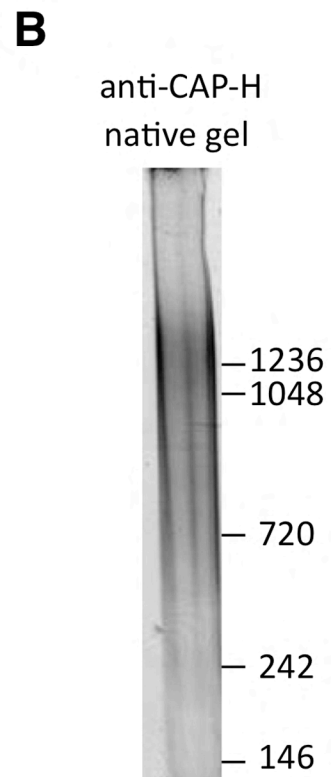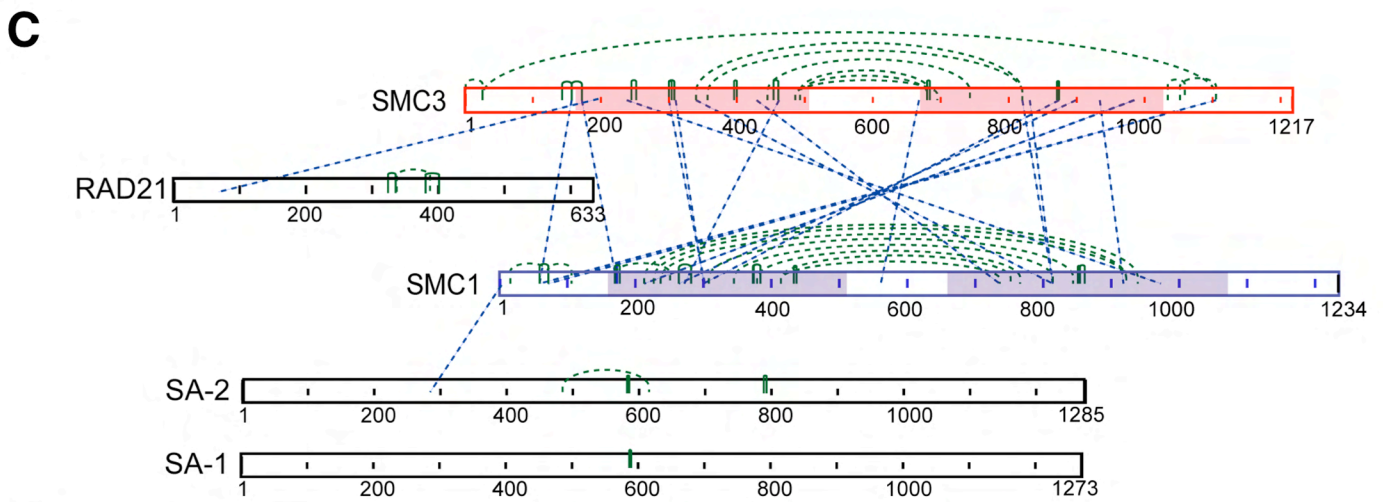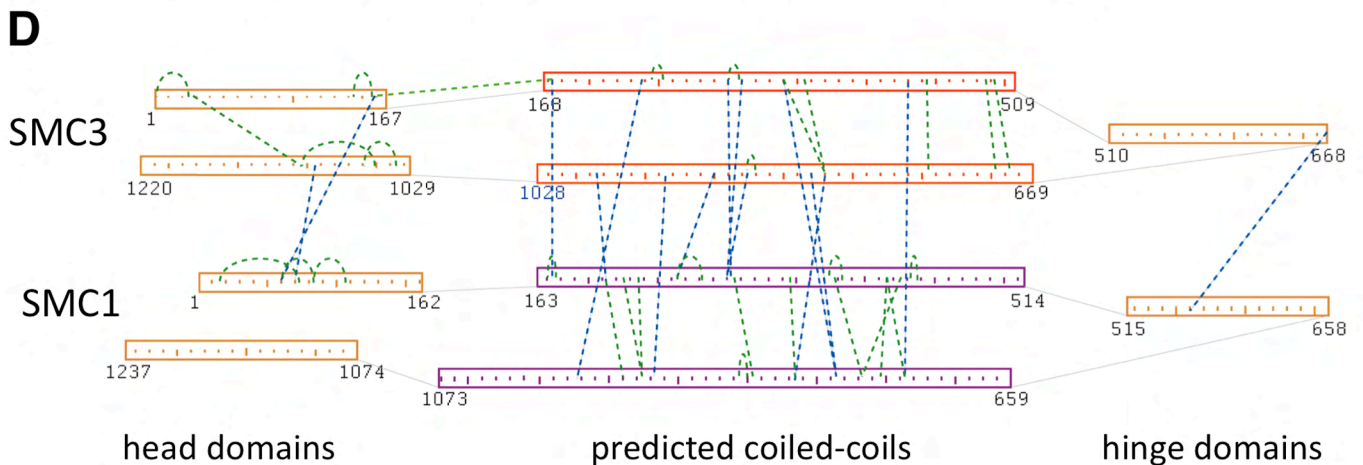

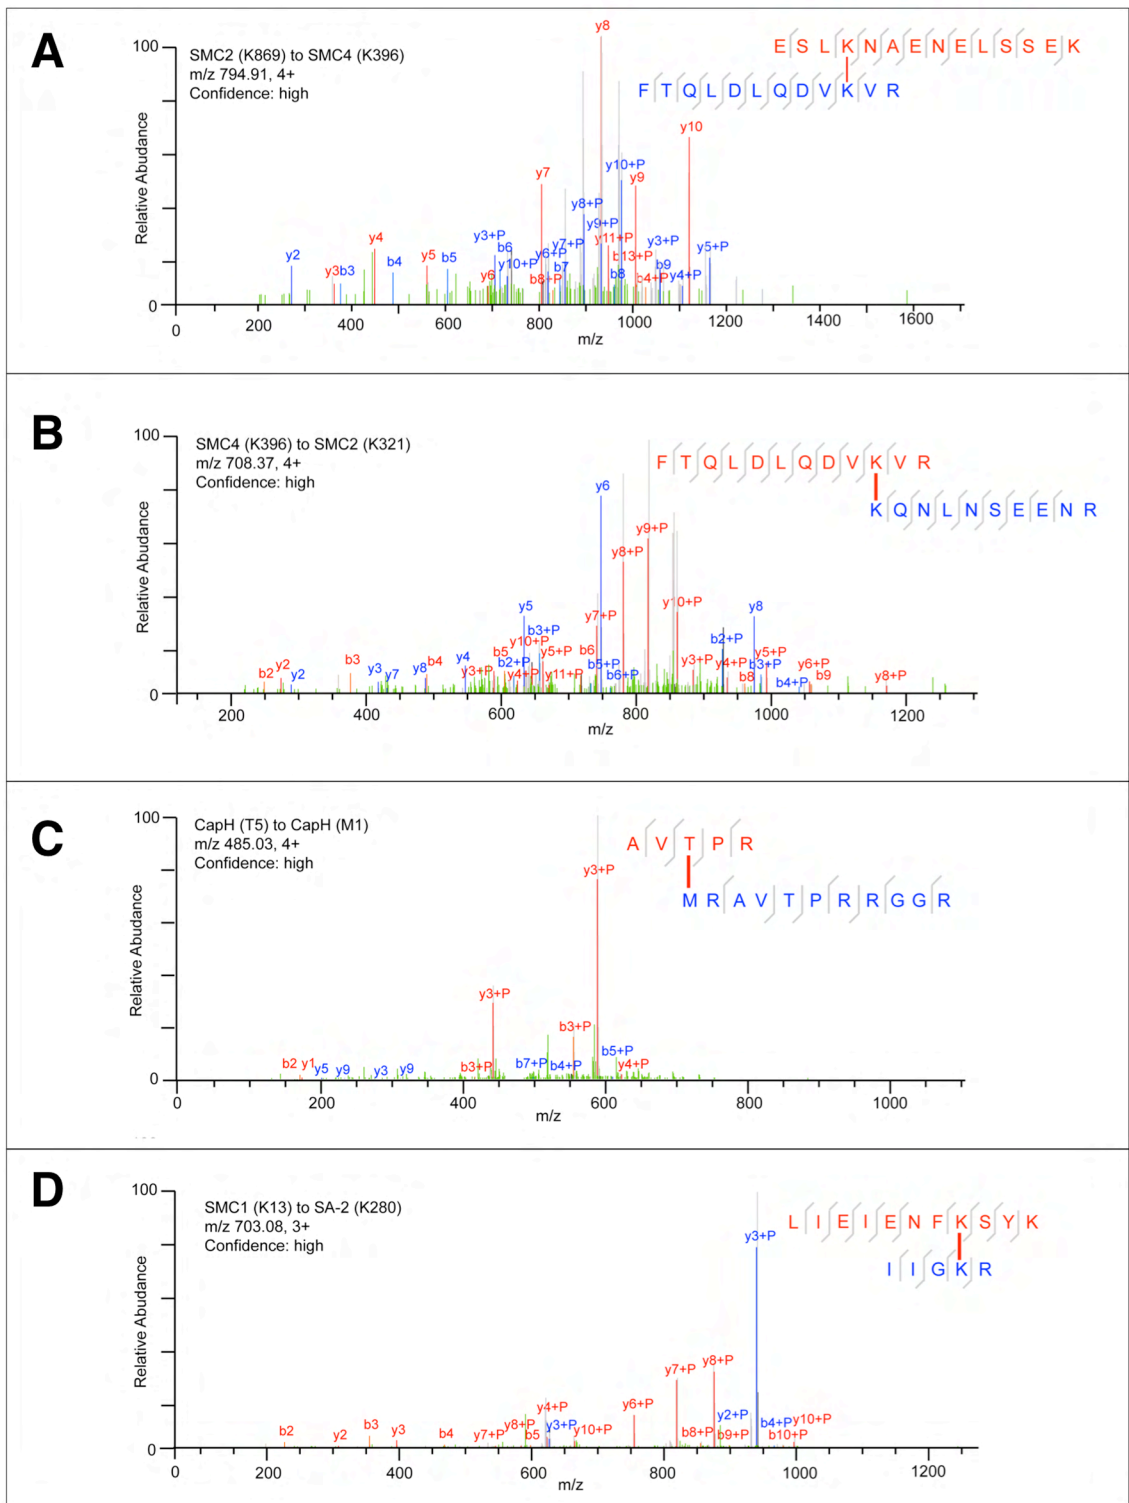

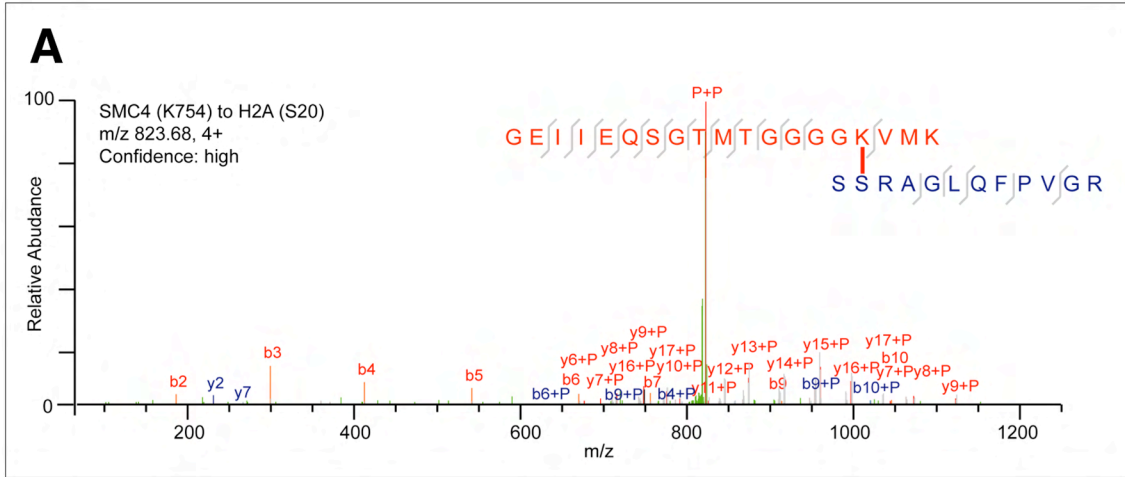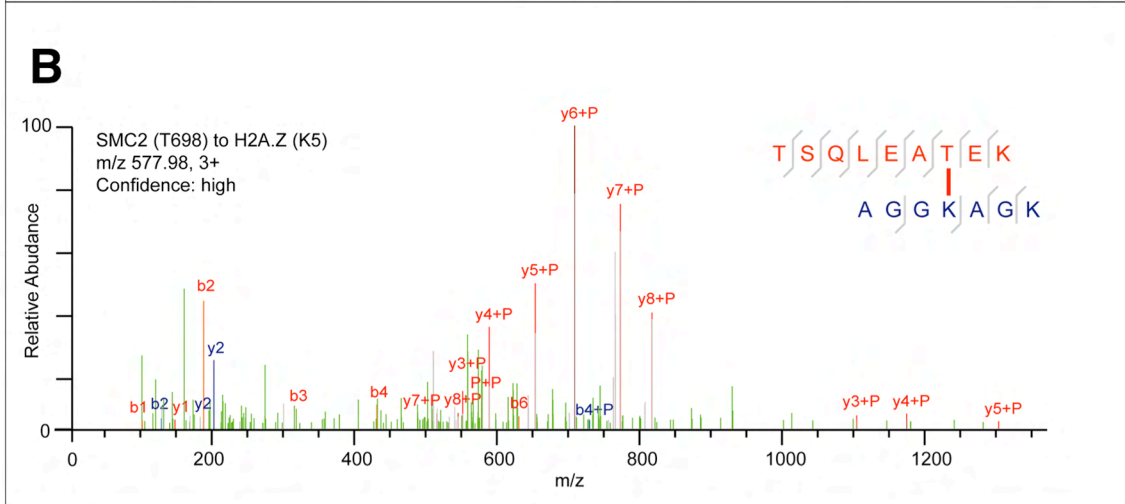



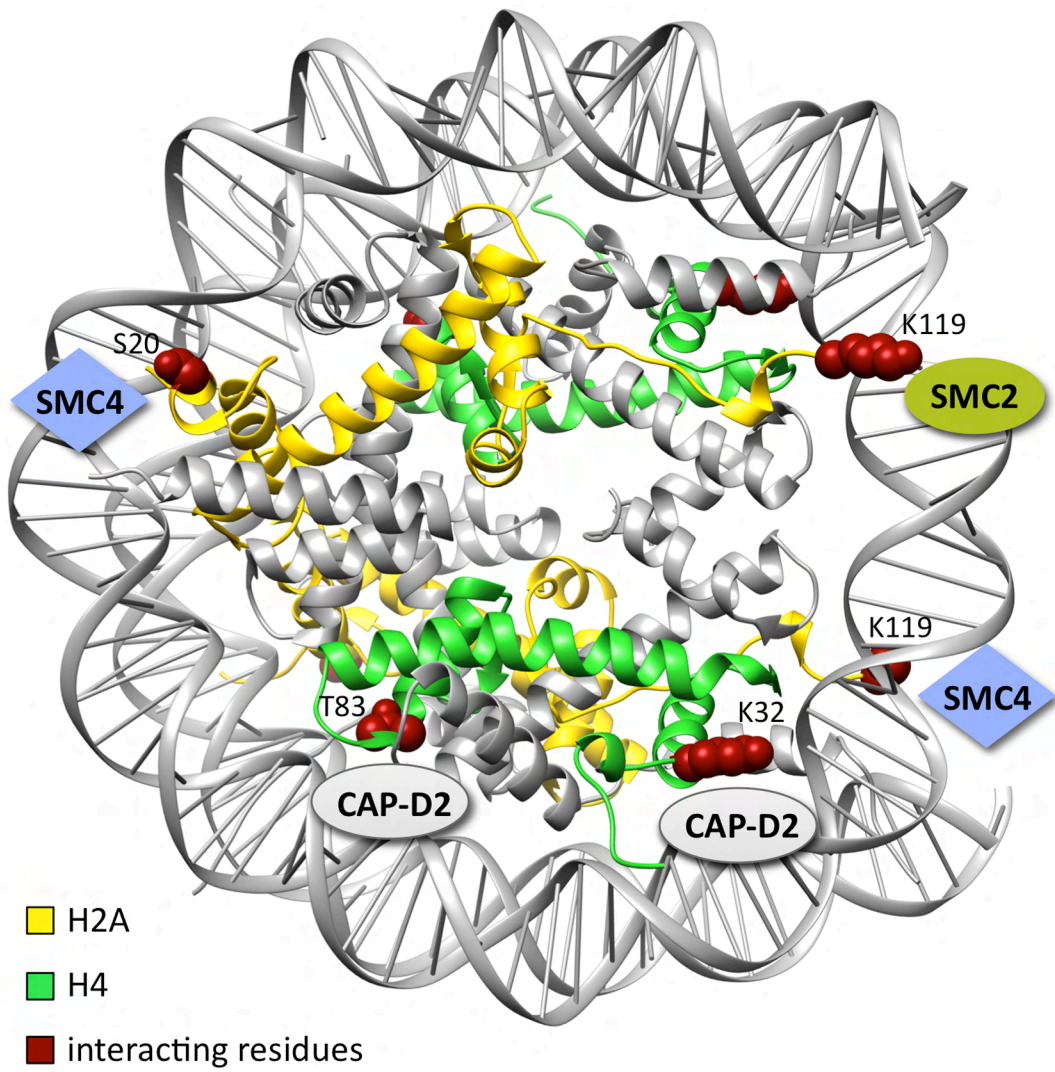

**Supplementary Table I. Summary of cross-links observed in this study**

**BAND i**

| Protein1 | Peptide Position 1 | Peptide 1                      | Pep 1 Link pos | Protein2 | Peptide Position 2 | Peptide 2       | Pep 2 Link pos |
|----------|--------------------|--------------------------------|----------------|----------|--------------------|-----------------|----------------|
| SMC4     | 535                | AAIKDIDIKLPTAEQELK             | 4              | SMC4     | 521                | EALMoxTTSETLKQR | 11             |
| CAP-D2   | 1279               | AASKPETK                       | 4              | CAP-D2   | 1358               | NNKR            | 3              |
| SMC2     | 411                | AATEAKQAQMK                    | 6              | SMC2     | 422                | LKYAQQELK       | 2              |
| SMC2     | 411                | AATEAKQAQMoxK                  | 6              | SMC2     | 422                | LKYAQQELK       | 2              |
| SMC4     | 448                | AKDKEEEK                       | 4              | SMC4     | 434                | NISDATSKK       | 8              |
| SMC2     | 618                | AMoxEYVFGTTLVCcmSS<br>MoxDNAKK | 19             | SMC2     | 638                | VTFDKR          | 5              |
| CAP-D2   | 1362               | AQKSHR                         | 3              | CAP-D2   | 1279               | AASKPETK        | 4              |
| CAP-D2   | 1362               | AQKSHR                         | 3              | CAP-D2   | 1358               | NNKR            | 3              |
| SMC4     | 919                | AQVAIKTAHR                     | 6              | SMC4     | 929                | NLKK            | 3              |
| SMC2     | 214                | ASYLEYQKMoxTR                  | 8              | CAP-H    | 198                | KHSFK           | 1              |
| SMC2     | 214                | ASYLEYQKMoxTR                  | 8              | SMC2     | 209                | LKEAR           | 2              |
| SMC4     | 786                | AVQCcmEEEKFQLEEDIT<br>K        | 16             | SMC4     | 803                | LQKNVR          | 3              |
| SMC4     | 417                | DKEKVEELKNVPSSSEK              | 9              | SMC4     | 929                | NLKK            | 3              |
| CAP-G    | 943                | DVPHTPVTEVKSK                  | 11             | CAP-G    | 960                | LKSTR           | 2              |
| SMC4     | 521                | EALMoxTTSETLKQR                | 11             | SMC4     | 535                | AAIKDIDIK       | 4              |
| CAP-D2   | 952                | EEEKTK                         | 4              | CAP-D2   | 970                | KRPR            | 1              |
| SMC2     | 275                | ELAQQIEETEK                    | 9              | SMC2     | 286                | KNNEEFGAK       | 1              |
| SMC4     | 854                | ELEKVLNSYK                     | 4              | SMC4     | 864                | KDYER           | 1              |
| CAP-G    | 524                | EQITELEHTK                     | 4              | SMC4     | 409                | KLEK            | 1              |
| CAP-G    | 524                | EQITELEHTKTNLIK                | 10             | CAP-G    | 493                | LAEIKVK         | 5              |
| CAP-G    | 524                | EQITELEHTKTNLIK                | 10             | CAP-G    | 493                | LAEIKVK         | 5              |

|        |     |                           |    |        |      |                |    |
|--------|-----|---------------------------|----|--------|------|----------------|----|
| SMC2   | 865 | ESLKNAENELSSEK            | 4  | SMC4   | 386  | FTQLDLQDVKVR   | 10 |
| SMC2   | 507 | FEYKNPEK                  | 4  | SMC2   | 562  | ILEKGQLK       | 4  |
| SMC2   | 507 | FEYKNPEK                  | 4  | SMC2   | 561  | KILEKGQLK      | 5  |
| SMC4   | 386 | FTQLDLQDVKVR              | 10 | SMC2   | 865  | ESLKNAENELSSEK | 4  |
| SMC4   | 386 | FTQLDLQDVKVR              | 10 | SMC2   | 320  | KQNLNSEENR     | 1  |
| SMC4   | 386 | FTQLDLQDVKVR              | 10 | SMC2   | 320  | KQNLNSEENRLK   | 1  |
| CAP-H  | 431 | HKSSADSEK                 | 2  | CAP-H  | 427  | FKPR           | 2  |
| CAP-H  | 431 | HKSSADSEKENK              | 2  | CAP-H  | 427  | FKPR           | 2  |
| CAP-H  | 603 | IAIQYAKTAK                | 7  | CAP-H  | 613  | KMoxDMoxK      | 1  |
| CAP-H  | 603 | IAIQYAKTAK                | 7  | CAP-H  | 613  | KMoxDMoxKR     | 1  |
| SMC4   | 372 | IDKITVLIENKNK             | 3  | SMC4   | 364  | ALKDLEKK       | 7  |
| SMC4   | 372 | IDKITVLIENKNK             | 3  | SMC4   | 367  | DLEKK          | 4  |
| CAP-G  | 452 | IKDDAR                    | 3  | CAP-G  | 729  | LISAKLLSR      | 5  |
| SMC2   | 354 | IKEGLNGLQEESK             | 2  | SMC2   | 348  | EKEIKK         | 2  |
| SMC2   | 562 | ILEKGQLK                  | 4  | SMC2   | 507  | FEYKNPEK       | 4  |
| CAP-D2 | 949 | ILREEEKT                  | 7  | CAP-D2 | 958  | KHKER          | 3  |
| SMC2   | 336 | IMoxQEEFKAFTSK            | 7  | SMC2   | 330  | LKELIK         | 2  |
| SMC4   | 330 | INDLETQKENIQKETKDI<br>NEK | 16 | SMC4   | 1006 | EALNIKFK       | 6  |
| SMC4   | 330 | INDLETQKENIQKETKDI<br>NEK | 16 | SMC4   | 351  | SSKLADEMoxK    | 3  |
| SMC2   | 178 | ITAHKTIEK                 | 5  | SMC2   | 172  | MoxYECcmKK     | 5  |
| CAP-G  | 973 | KA AVGTR                  | 1  | CAP-G  | 960  | LKSTR          | 2  |
| CAP-G  | 973 | KA AVGTR                  | 1  | CAP-G  | 980  | SVCcmR         | 1  |
| SMC2   | 767 | KAEEEYK                   | 1  | SMC2   | 760  | KTEESQR        | 1  |
| SMC4   | 563 | KEELNAQDLVR               | 1  | SMC4   | 555  | ENKLEKLLK      | 6  |
| SMC4   | 563 | KEELNAQDLVR               | 1  | SMC4   | 558  | LEKLLK         | 3  |
| SMC2   | 261 | KIFESMoxAENEK             | 1  | SMC2   | 248  | STNALKEAQANKK  | 6  |
| SMC2   | 261 | KIFESMoxAENEKK            | 1  | SMC2   | 248  | STNALKEAQANKK  | 6  |
| SMC2   | 353 | KIKEGLNGLQEESKK           | 3  | SMC2   | 348  | EKEIK          | 2  |



|        |      |                         |    |        |      |               |    |
|--------|------|-------------------------|----|--------|------|---------------|----|
| SMC2   | 561  | KILEKGQLK               | 5  | SMC2   | 507  | FEYKNPEK      | 4  |
| CAP-H  | 197  | KKHSFK                  | 2  | CAP-H  | 193  | VQTK          | 3  |
| SMC2   | 260  | KKIFESMoxAENEK          | 1  | SMC2   | 248  | STNALKEAQANK  | 6  |
| CAP-G  | 227  | KLAYEVLAEK              | 1  | CAP-G  | 210  | TLPKIVGR      | 4  |
| CAP-G  | 227  | KLAYEVLAEK              | 1  | CAP-G  | 218  | TMoxDVKEAVR   | 5  |
| SMC2   | 482  | KQLSSEISLR              | 1  | SMC4   | 803  | LQKNVR        | 3  |
| SMC2   | 482  | KQLSSEISLR              | 1  | SMC4   | 803  | LQKNVR        | 3  |
| SMC2   | 482  | KQLSSEISLR              | 1  | SMC4   | 803  | LQKNVR        | 3  |
| SMC2   | 320  | KQNLNSEENR              | 1  | SMC4   | 386  | FTQLDLQDVKVR  | 10 |
| SMC2   | 1176 | KQPLSEASNKDE            | 1  | SMC2   | 1170 | HCcmQLKK      | 5  |
| CAP-G  | 488  | KQQIKLAEIK              | 5  | CAP-G  | 498  | VKLFEAK       | 2  |
| SMC4   | 354  | LADEMKSK                | 6  | SMC4   | 364  | ALKDLEK       | 3  |
| CAP-D2 | 799  | LAEEVCcmNAISK           | 10 | CAP-D2 | 810  | LASNSKPAEGK   | 6  |
| CAP-G  | 493  | LAEIKVK                 | 5  | CAP-G  | 452  | IIKDDARR      | 3  |
| CAP-D2 | 810  | LASNSKPAEGK             | 6  | CAP-D2 | 821  | NSVPFR        | 2  |
| SMC4   | 689  | LIDLVKVEDK              | 6  | SMC4   | 676  | NLQKIPTPENAPR | 4  |
| CAP-G  | 729  | LISAKLLSR               | 5  | CAP-G  | 452  | IIKDDAR       | 3  |
| CAP-G  | 152  | LKDKFSNVR               | 2  | CAP-G  | 218  | TMoxDVKEAVR   | 5  |
| SMC4   | 456  | LKQVMoxSSLQEETR         | 2  | SMC2   | 789  | EIKNAQQK      | 3  |
| SMC4   | 456  | LKQVMoxSSLQEETR         | 2  | SMC2   | 787  | GKEIKNAQQK    | 5  |
| SMC4   | 456  | LKQVMoxSSLQEETR         | 2  | SMC2   | 802  | KKADDSSR      | 1  |
| SMC2   | 422  | LKYAQQLK                | 2  | SMC2   | 411  | AATEAKQAQMK   | 6  |
| SMC2   | 467  | LKYEEAEQEAHLAK          | 2  | SMC4   | 803  | LQKNVR        | 3  |
| SMC2   | 467  | LKYEEAEQEAHLAK          | 2  | SMC2   | 706  | NMoxAEKYQHLK  | 5  |
| SMC2   | 467  | LKYEEAEQEAHLAK          | 2  | SMC2   | 711  | YQHLKQQWEMoxK | 5  |
| CAP-D2 | 1062 | LLFTMoxMoxEK            | 4  | CAP-D2 | 1070 | SPLPVVR       | 1  |
| CAP-D2 | 530  | LTQKALCcmR              | 4  | CAP-D2 | 455  | LQEMoxKDR     | 5  |
| CAP-D2 | 530  | LTQKALCcmR              | 4  | CAP-D2 | 455  | LQEMoxKDR     | 5  |
| SMC2   | 439  | MoxDGSYKEDQEAFEAI<br>RK | 6  | SMC2   | 433  | QAEVKK        | 5  |

|        |     |                           |    |        |      |                            |   |
|--------|-----|---------------------------|----|--------|------|----------------------------|---|
| SMC4   | 759 | MoxGSSVVTDVSPPEEVN<br>R   | 10 | SMC4   | 593  | GKVLEALLEQKR               | 2 |
| SMC2   | 792 | NAQQKLNSAK                | 5  | SMC2   | 787  | GKEIK                      | 2 |
| SMC2   | 792 | NAQQKLNSAK                | 5  | SMC2   | 803  | KADDSSR                    | 1 |
| SMC2   | 112 | NKYLINGMoxNASNNR          | 2  | SMC2   | 68   | NGQAGV NKATVSITF<br>DNSDKK | 8 |
| SMC4   | 676 | NLQKIPTPENAPR             | 4  | SMC4   | 689  | LIDLKVEDK                  | 6 |
| CAP-D2 | 821 | NSVPPFR                   | 2  | CAP-D2 | 810  | LASNSKPAEGK                | 6 |
| SMC4   | 577 | QKVEEAK                   | 2  | SMC2   | 566  | GQLKHR                     | 4 |
| SMC2   | 740 | QQEDLLALKK                | 9  | SMC2   | 424  | YAQQELKTK                  | 7 |
| CAP-G  | 489 | QQIKLAEIK                 | 4  | CAP-G  | 498  | VKLFEAK                    | 2 |
| CAP-H  | 644 | QSDTSVVTGKAFSSITK         | 11 | SMC4   | 1    | ASRSTK                     | 1 |
| CAP-D2 | 932 | QVAHLEVSVAELR             | 8  | CAP-H  | 655  | AFSSITKELLHR               | 7 |
| SMC4   | 269 | RVETLNEQRGEKLN R          | 12 | SMC4   | 1095 | KEELYLKR                   | 7 |
| SMC4   | 269 | RVETLNEQRGEKLN R          | 12 | SMC4   | 1094 | RKEELYLK                   | 2 |
| CAP-D2 | 963 | SDSSTIK                   | 5  | CAP-D2 | 970  | KRPR                       | 1 |
| CAP-D2 | 963 | SDSSTIKK                  | 7  | CAP-D2 | 959  | HKER                       | 2 |
| CAP-D2 | 963 | SDSSTIKK                  | 7  | CAP-D2 | 949  | ILREEE KTK                 | 7 |
| CAP-H  | 374 | SFTTV CcmESKK             | 9  | CAP-H  | 427  | FKPR                       | 2 |
| CAP-H  | 476 | SILENQNVK                 | 1  | CAP-H  | 469  | AALTLSK                    | 6 |
| SMC4   | 362 | SKALKDLEK                 | 2  | SMC4   | 354  | LADEMoxKSK                 | 6 |
| SMC4   | 493 | SKMoxDVAQAELDIYLT<br>R    | 2  | SMC2   | 411  | AATEAKQAQMoxK              | 6 |
| CAP-H  | 433 | SSADSEK                   | 1  | CAP-H  | 427  | FKPR                       | 2 |
| CAP-H  | 433 | SSADSEKENK                | 7  | CAP-H  | 427  | FKPR                       | 2 |
| CAP-H  | 433 | SSADSEKENKK               | 7  | CAP-H  | 427  | FKPR                       | 2 |
| CAP-H  | 633 | STEAIEDVEKQSDTSVV<br>TGEK | 11 | CAP-H  | 655  | AFSSITKELLHR               | 7 |
| SMC4   | 200 | STFKDVGILLR               | 4  | SMC4   | 130  | AQKIR                      | 3 |
| SMC2   | 248 | STNALKEAQANK              | 6  | SMC2   | 241  | AEEIKDR                    | 5 |

|       |      |                   |    |       |      |                |    |
|-------|------|-------------------|----|-------|------|----------------|----|
| SMC2  | 248  | STNALKEAQANK      | 6  | SMC2  | 241  | AEEIKDR        | 5  |
| CAP-G | 980  | SVCcmR            | 1  | CAP-G | 973  | KAAVGTR        | 1  |
| CAP-H | 203  | TIEQNLNNINVTEANRR | 1  | CAP-H | 199  | HSFK           | 2  |
| CAP-H | 467  | TKAALTLSK         | 2  | CAP-G | 154  | DKFSNVR        | 2  |
| SMC2  | 885  | TKDIKAK           | 5  | SMC2  | 895  | IEKYR          | 3  |
| SMC2  | 1158 | TKFVDGISTVSR      | 2  | SMC2  | 209  | LKEAR          | 2  |
| CAP-G | 210  | TLPKIVGR          | 4  | CAP-G | 452  | IHKDDAR        | 3  |
| CAP-G | 210  | TLPKIVGR          | 4  | CAP-G | 218  | TMoxDVKEAVR    | 5  |
| CAP-G | 218  | TMoxDVKEAVR       | 5  | CAP-H | 427  | FKPR           | 2  |
| SMC4  | 897  | TQQDKVDKINQEIDECc | 5  | SMC4  | 434  | NISDATSKK      | 8  |
|       |      | mTSAITK           |    |       |      |                |    |
| SMC2  | 691  | TSQLEATEKELANLK   | 9  | SMC2  | 467  | LKYEEAEQEHLAKK | 14 |
| SMC2  | 691  | TSQLEATEKELANLK   | 9  | SMC2  | 467  | LKYEEAEQEHLAKK | 14 |
|       |      |                   |    |       |      | K              |    |
| SMC4  | 7    | TSTAAHQKGR        | 8  | SMC4  | 278  | GEKLNK         | 3  |
| H4    | 80   | TVTAMoxDVVYALKR   | 12 | H2A   | 36   | KGNYAER        | 1  |
| CAP-H | 151  | VDAVHADTYK        | 8  | CAP-H | 161  | VLGGLGKESAPTK  | 7  |
| CAP-H | 151  | VDAVHADTYKVLGGLG  | 10 | CAP-H | 427  | FKPR           | 2  |
|       |      | K                 |    |       |      |                |    |
| CAP-H | 151  | VDAVHADTYKVLGGLG  | 10 | CAP-H | 193  | VQTKK          | 4  |
|       |      | K                 |    |       |      |                |    |
| SMC4  | 695  | VEDKSFSPAFYFALR   | 4  | SMC4  | 675  | KNLQK          | 1  |
| SMC4  | 695  | VEDKSFSPAFYFALR   | 4  | SMC4  | 676  | NLQKIPTPENAPR  | 4  |
| SMC4  | 421  | VEELKNVPSSEK      | 5  | SMC4  | 929  | NLKK           | 3  |
| CAP-G | 550  | VEKNDPETLLK       | 3  | CAP-G | 452  | IHKDDARR       | 3  |
| SMC4  | 270  | VETLNEQRGEKLNK    | 11 | SMC4  | 1094 | RKEELYLKR      | 8  |
| SMC2  | 1071 | VGLGDIWKENLTELSSG | 8  | SMC2  | 209  | LKEAR          | 2  |
|       |      | QR                |    |       |      |                |    |
| SMC2  | 273  | VKELAQQIEETEK     | 11 | SMC2  | 286  | KNNEEFGAK      | 1  |
| CAP-G | 248  | VKLLQQGLNDR       | 2  | CAP-G | 452  | IHKDDAR        | 3  |

|       |     |                                 |    |       |     |                |   |
|-------|-----|---------------------------------|----|-------|-----|----------------|---|
| CAP-G | 248 | VKLLQQGLNDR                     | 2  | CAP-G | 218 | TMoxDVKEAVR    | 5 |
| CAP-H | 161 | VLGGLGKESAPTK                   | 7  | CAP-H | 193 | VQTKK          | 4 |
| SMC4  | 869 | VSEQAGKMESEVKR                  | 7  | SMC4  | 864 | KDYER          | 1 |
| SMC4  | 869 | VSEQAGKMoxESEVKR                | 7  | SMC4  | 473 | EKEGKEK        | 5 |
| SMC4  | 869 | VSEQAGKMoxESEVKR                | 7  | SMC4  | 864 | KDYER          | 1 |
| SMC4  | 733 | VVTLKGEIIEQSGTMoxT<br>GGGGK     | 5  | SMC4  | 754 | VMoxKGR        | 3 |
| SMC2  | 424 | YAQQELKTK                       | 7  | SMC2  | 433 | QAEVKK         | 5 |
| SMC4  | 509 | YNTAVSQLDEAKEALMo<br>xTTSETLK   | 12 | SMC4  | 831 | LKGQVK         | 2 |
| SMC4  | 509 | YNTAVSQLDEAKEALMo<br>xTTSETLKQR | 23 | SMC4  | 831 | LKGQVK         | 2 |
| SMC2  | 711 | YQHLKQQWEMoxK                   | 5  | SMC2  | 467 | LKYEEAEQEAHLAK | 2 |

### BAND ii

| Protein1 | Peptide<br>Position<br>1 | Peptide 1       | Pep 1<br>Link<br>pos | Protein2 | Peptide<br>Position<br>2 | Peptide 2        | Pep 2<br>Link<br>pos |
|----------|--------------------------|-----------------|----------------------|----------|--------------------------|------------------|----------------------|
| SMC2     | 411                      | AATEAKQAQMK     | 6                    | SMC2     | 422                      | LKYAQQELK        | 2                    |
| SMC2     | 411                      | AATEAKQAQMoxK   | 6                    | SMC2     | 422                      | LKYAQQELKbs3ohTK | 2                    |
| SMC4     | 364                      | ALKDLEK         | 3                    | SMC4     | 354                      | LADEMoxKSK       | 6                    |
| SMC2     | 214                      | ASYLEYQKMoxTR   | 8                    | SMC2     | 209                      | LKEAR            | 2                    |
| SMC4     | 521                      | EALMoxtTSETLKQR | 11                   | SMC4     | 535                      | AAIKDIDIK        | 4                    |
| SMC2     | 275                      | ELAQQIEETEK     | 9                    | SMC2     | 286                      | KNNEEFGAK        | 1                    |
| SMC4     | 854                      | ELEKVLNSYK      | 4                    | SMC4     | 864                      | KDYER            | 1                    |
| SMC2     | 865                      | ESLKNAENELSSEK  | 4                    | SMC4     | 386                      | FTQLDLQDVKVR     | 10                   |
| SMC2     | 865                      | ESLKNAENELSSEK  | 4                    | SMC4     | 386                      | FTQLDLQDVKVR     | 10                   |

|        |     |                    |    |        |      |                |   |
|--------|-----|--------------------|----|--------|------|----------------|---|
| SMC2   | 507 | FEYKNPEK           | 4  | SMC2   | 562  | ILEKGQLK       | 4 |
| SMC4   | 386 | FTQLDLQDVKVR       | 10 | SMC2   | 865  | ESLKNAENELSSEK | 4 |
| SMC4   | 278 | GEKLNK             | 3  | SMC4   | 1095 | KEELYLKR       | 7 |
| SMC2   | 262 | IFESMoxAENEKK      | 10 | SMC2   | 892  | SAKIEK         | 3 |
| SMC2   | 562 | ILEKGQLK           | 4  | SMC2   | 507  | FEYKNPEK       | 4 |
| CAP-G  | 227 | KLAYEVLAEK         | 1  | CAP-G  | 218  | TMoxDVKEAVR    | 5 |
| SMC2   | 760 | KTEESQR            | 1  | SMC2   | 767  | KAEEEEYK       | 1 |
| SMC4   | 354 | LADKMSK            | 6  | SMC4   | 364  | ALKDLEK        | 3 |
| SMC4   | 456 | LKQVMoxSSLQEETR    | 2  | SMC2   | 802  | KKADDSSR       | 2 |
| SMC2   | 422 | LKYAQQELKbs3nh2TK  | 2  | SMC2   | 411  | AATEAKQAQMoxK  | 6 |
| CAP-D2 | 439 | LSCcmSDLAEPLKK     | 11 | CAP-D2 | 455  | LQEMoxKDR      | 5 |
| CAP-D2 | 530 | LTQKALCcmR         | 4  | CAP-D2 | 521  | KLNYK          | 1 |
| CAP-D2 | 530 | LTQKALCcmR         | 4  | CAP-D2 | 455  | LQEMoxKDR      | 5 |
| SMC2   | 779 | MoxKNAEAER         | 2  | SMC2   | 767  | KAEEEEYKALENK  | 7 |
| SMC2   | 792 | NAQQKLNSAK         | 5  | SMC2   | 787  | GKEIK          | 2 |
| SMC2   | 792 | NAQQKLNSAK         | 5  | SMC2   | 803  | KADDSSR        | 1 |
| SMC2   | 792 | NAQQKLNSAK         | 5  | SMC2   | 802  | KKADDSSR       | 2 |
| SMC2   | 406 | NEISKAATEAK        | 5  | SMC2   | 760  | KTEESQR        | 1 |
| SMC4   | 434 | NISDATSKK          | 8  | SMC4   | 448  | AKDKKEEK       | 4 |
| CAP-H  | 433 | SSADSEKENK         | 1  | CAP-H  | 427  | FKPR           | 2 |
| SMC2   | 248 | STNALKbs3ohEAQANK  | 2  | SMC2   | 260  | KKIFESMoxAENEK | 2 |
| SMC2   | 248 | STNALKEAQANK       | 6  | SMC2   | 241  | AEEIKDR        | 5 |
| SMC2   | 248 | STNALKEAQANKbs3nh2 | 6  | SMC2   | 241  | AEEIKDR        | 5 |
|        |     | K                  |    |        |      |                |   |
| SMC2   | 248 | STNALKEAQANKbs3ohK | 6  | SMC2   | 241  | AEEIKDR        | 5 |
| SMC2   | 248 | STNALKEAQANKK      | 6  | SMC2   | 241  | AEEIKDR        | 5 |
| CAP-G  | 210 | TLPKIVGR           | 4  | CAP-G  | 218  | TMoxDVKEAVR    | 5 |
| CAP-G  | 218 | TMDVKEAVR          | 5  | CAP-H  | 427  | FKPR           | 2 |
| CAP-G  | 218 | TMoxDVKEAVR        | 5  | CAP-H  | 427  | FKPR           | 2 |
| CAP-G  | 218 | TMoxDVKEAVR        | 5  | CAP-H  | 427  | FKPR           | 2 |

|       |     |                  |   |       |     |           |   |
|-------|-----|------------------|---|-------|-----|-----------|---|
| SMC2  | 691 | TSQLEATEKELANLK  | 9 | SMC2  | 682 | DAEDELKIK | 7 |
| SMC2  | 308 | VDAKVR           | 4 | SMC2  | 314 | SDLHR     | 1 |
| CAP-H | 161 | VLGGLGKESAPTK    | 7 | CAP-H | 193 | VQTKK     | 4 |
| SMC4  | 869 | VSEQAGKMoxESEVKR | 7 | SMC4  | 864 | KDYER     | 1 |
| SMC2  | 424 | YAQQELKTK        | 7 | SMC2  | 433 | QAEVKK    | 5 |

### BAND iii

| Protein1 | Peptide Position 1 | Peptide 1      | Pep 1 Link pos | Protein2 | Peptide Position 2 | Peptide 2        | Pep 2 Link pos |
|----------|--------------------|----------------|----------------|----------|--------------------|------------------|----------------|
| CAP-D2   | 1279               | AASKPETK       | 4              | CAP-D2   | 1208               | QTESLVEKLCcmQR   | 8              |
| SMC2     | 411                | AATEAKQAQMK    | 6              | SMC4     | 480                | ELMEFCcmKTVNDAR  | 7              |
| SMC2     | 411                | AATEAKQAQMK    | 6              | SMC2     | 422                | LKYAQQELK        | 2              |
| SMC2     | 411                | AATEAKQAQMoxK  | 6              | SMC2     | 422                | LKYAQQELK        | 2              |
| SMC2     | 241                | AEEIKDR        | 5              | SMC2     | 933                | LLKEYK           | 3              |
| SMC2     | 241                | AEEIKDR        | 5              | SMC2     | 248                | STNALKEAQANKK    | 6              |
| SMC2     | 774                | ALENKMK        | 5              | SMC2     | 787                | GKEIK            | 2              |
| SMC2     | 774                | ALENKMK        | 5              | SMC2     | 767                | KAEEEYK          | 1              |
| SMC4     | 364                | ALKDLEK        | 3              | SMC4     | 354                | LADEMoxKSK       | 6              |
| SMC4     | 130                | AQKIR          | 3              | SMC4     | 278                | GEKLNK           | 3              |
| SMC4     | 919                | AQVAIKTAHR     | 6              | SMC2     | 343                | AFTSKEK          | 5              |
| CAPG     | 342                | CcmLCcmEHLKSK  | 7              | CAP-G    | 452                | IHKDDAR          | 3              |
| SMC2     | 682                | DAEDELKIK      | 7              | SMC2     | 507                | FEYKNPEK         | 4              |
| SMC4     | 539                | DIDIKLPTAEQELK | 5              | SMC4     | 794                | FQLEEDITKLQK     | 9              |
| SMC4     | 346                | DINEKSSK       | 5              | SMC4     | 330                | INDLETQKENIQKETK | 8              |
| SMC4     | 450                | DKEEEKLK       | 6              | SMC4     | 443                | ELLEKAK          | 5              |
| SMC4     | 417                | DKEKVEELK      | 4              | SMC4     | 932                | KSEDSVLR         | 1              |
| SMC4     | 710                | DTLVVKDLEDATR  | 6              | SMC2     | 562                | ILEKGQLK         | 4              |

|        |     |                    |    |        |      |                  |    |
|--------|-----|--------------------|----|--------|------|------------------|----|
| SMC4   | 521 | EALMoxTTSETLKQR    | 11 | SMC4   | 535  | AAIKDIDIK        | 4  |
| SMC4   | 521 | EALMTTSETLKQR      | 11 | SMC4   | 535  | AAIKDIDIK        | 4  |
| SMC4   | 475 | EGKEKELMEFCcmK     | 5  | SMC4   | 469  | EIQKEK           | 4  |
| CAP-D2 | 279 | EIGQKCcmPQELAR     | 5  | CAP-D2 | 455  | LQEMKDR          | 5  |
| SMC4   | 950 | EIKDLTEELTTLEDK    | 3  | SMC4   | 940  | TEKEIGDNEK       | 3  |
| SMC4   | 478 | EKELMEFCcmK        | 2  | SMC4   | 469  | EIQKEK           | 4  |
| SMC4   | 478 | EKELMEFCcmK        | 2  | SMC2   | 779  | MKNAEAER         | 2  |
| SMC4   | 478 | EKELMEFCcmK        | 2  | SMC2   | 779  | MoxKNAEAER       | 2  |
| SMC4   | 478 | EKELMoxEFCcmK      | 2  | SMC4   | 469  | EIQKEK           | 4  |
| SMC4   | 478 | EKELMoxEFCcmKTVND  | 9  | SMC2   | 779  | MoxKNAEAER       | 2  |
|        |     | AR                 |    |        |      |                  |    |
| SMC4   | 398 | EKLKHAK            | 4  | CAP-H  | 285  | SLLEK            | 1  |
| SMC2   | 700 | ELANLKNMAEK        | 6  | SMC4   | 803  | LQKNVR           | 3  |
| SMC2   | 275 | ELAQQIEETEK        | 9  | SMC2   | 286  | KNNEEFGAK        | 1  |
| SMC4   | 837 | ELEANVTAAAPDKNKQ   | 13 | SMC2   | 422  | LKYAQQELK        | 2  |
|        |     | K                  |    |        |      |                  |    |
| SMC2   | 332 | ELIKIMQEEFK        | 4  | SMC4   | 940  | TEKEIGDNEK       | 3  |
| SMC4   | 480 | ELMEFCcmKTVNDAR    | 7  | SMC2   | 411  | AATEAKQAQMK      | 6  |
| SMC4   | 480 | ELMoxEFCcmKTVNDAR  | 7  | SMC2   | 779  | MKNAEAER         | 2  |
| SMC2   | 851 | EQVSALEAEAVKTR     | 12 | SMC2   | 865  | ESLKNAENELSSEK   | 4  |
| SMC2   | 188 | ESKLDEIR           | 3  | SMC2   | 183  | TIEKK            | 4  |
| SMC2   | 865 | ESLKNAENELSSEK     | 4  | SMC4   | 386  | FTQLDLQDVKVR     | 10 |
| SMC4   | 343 | ETKDINEK           | 3  | SMC4   | 351  | SSKLADEMK        | 3  |
| SMC2   | 507 | FEYKNPEK           | 4  | SMC2   | 562  | ILEKGQLK         | 4  |
| CAP-D2 | 748 | FTEKTQCcmSPLER     | 4  | CAP-D2 | 1279 | AASKPETK         | 4  |
| CAP-D2 | 748 | FTEKTQCcmSPLER     | 4  | CAP-D2 | 810  | LASNSKPAEGK      | 6  |
| SMC4   | 386 | FTQLDLQDVKVR       | 10 | SMC2   | 865  | ESLKNAENELSSEK   | 4  |
| SMC4   | 386 | FTQLDLQDVKVR       | 10 | SMC2   | 320  | KQNLNSEENR       | 1  |
| SMC4   | 738 | GEIIEQSGTMoxTGGGGK | 16 | SMC4   | 759  | MGSSVVTDVSPPEEVN | 4  |
|        |     | VMK                |    |        |      | R                |    |

|        |      |                            |    |        |      |                 |    |
|--------|------|----------------------------|----|--------|------|-----------------|----|
| SMC4   | 738  | GEIIEQSGTMTGGGGKV<br>MK    | 16 | H2A    | 18   | SSRAGLQFPVGR    | 2  |
| SMC4   | 278  | GEKLNK                     | 3  | CAP-D2 | 1362 | AQKSHR          | 3  |
| SMC4   | 278  | GEKLNK                     | 3  | SMC4   | 284  | VKMVEK          | 2  |
| SMC4   | 278  | GEKLNK                     | 3  | SMC2   | 997  | YNDLMKK         | 6  |
| SMC2   | 787  | GKEIKNAQQK                 | 5  | SMC2   | 797  | LNSAKK          | 5  |
| CAP-H  | 603  | IAIQYAKTAK                 | 7  | CAP-H  | 613  | KMDMK           | 1  |
| CAP-H  | 603  | IAIQYAKTAK                 | 7  | CAP-H  | 613  | KMDMoxK         | 1  |
| CAP-H  | 603  | IAIQYAKTAK                 | 7  | CAP-H  | 613  | KMoxDMK         | 1  |
| CAP-H  | 603  | IAIQYAKTAK                 | 7  | CAP-H  | 613  | KMoxDMoxK       | 1  |
| CAP-H  | 603  | IAIQYAKTAK                 | 7  | CAP-H  | 614  | MDMKR           | 4  |
| SMC2   | 262  | IFESMAENEKK                | 10 | SMC2   | 892  | SAKIEK          | 3  |
| SMC2   | 354  | IKEGLNGLQEESK              | 2  | CAP-H  | 197  | KKHSFK          | 2  |
| SMC2   | 354  | IKEGLNGLQEESKK             | 2  | SMC2   | 348  | EKEIKK          | 2  |
| SMC2   | 689  | IKTSQLEATEK                | 2  | SMC2   | 467  | LKYEEAEQEAHLAKK | 14 |
| SMC2   | 689  | IKTSQLEATEK                | 2  | SMC2   | 469  | YEEAEQEAHLAKK   | 12 |
| SMC2   | 562  | ILEKGQLK                   | 4  | SMC2   | 507  | FEYKNPEK        | 4  |
| SMC4   | 330  | INDLETQKENIQK              | 8  | SMC4   | 343  | ETKDINEK        | 3  |
| SMC4   | 905  | INQEIDECcmTSAITKAQ<br>VAIK | 14 | SMC4   | 434  | NISDATSKK       | 8  |
| SMC2   | 178  | ITAHKTIEK                  | 5  | SMC2   | 172  | MYECcmKK        | 5  |
| SMC4   | 534  | KAAIK                      | 1  | SMC4   | 831  | LKGQVK          | 2  |
| SMC2   | 767  | KAEEEYKALENK               | 7  | SMC2   | 779  | MKNAEAER        | 2  |
| SMC4   | 1095 | KEELYLKR                   | 7  | SMC4   | 278  | GEKLNK          | 3  |
| SMC2   | 261  | KIFESMAENEK                | 1  | SMC2   | 248  | STNALKEAQANK    | 6  |
| SMC2   | 261  | KIFESMAENEKK               | 1  | SMC2   | 248  | STNALKEAQANKK   | 6  |
| SMC2   | 261  | KIFESMoxAENEK              | 1  | SMC2   | 248  | STNALKEAQANK    | 6  |
| SMC2   | 177  | KITAHK                     | 1  | SMC2   | 183  | TIEKK           | 4  |
| CAP-D2 | 521  | KLNYK                      | 1  | CAP-D2 | 455  | LQEMKDR         | 5  |
| SMC2   | 438  | KMDGSYKEDQEAFAIR           | 1  | SMC2   | 740  | QQEDLLALKK      | 9  |



|        |      |                 |    |        |      |               |    |
|--------|------|-----------------|----|--------|------|---------------|----|
| SMC2   | 482  | KQLSSEISSLR     | 1  | SMC2   | 700  | ELANLKNMAEK   | 6  |
| SMC2   | 482  | KQLSSEISSLR     | 1  | SMC4   | 803  | LQKNVR        | 3  |
| SMC2   | 320  | KQNLNSEENR      | 1  | SMC2   | 330  | LKELIK        | 2  |
| SMC2   | 1176 | KQPLSEASNNKDE   | 1  | CAP-D2 | 358  | GTRDNFLK      | 2  |
| SMC2   | 1176 | KQPLSEASNNKDE   | 1  | SMC2   | 1170 | HCcmQLKK      | 5  |
| SMC4   | 354  | LADEMKS         | 6  | SMC4   | 362  | SKALKDLEK     | 2  |
| SMC4   | 354  | LADEMoxKSK      | 6  | SMC4   | 364  | ALKDLEK       | 3  |
| SMC4   | 354  | LADEMoxKSK      | 6  | SMC4   | 362  | SKALK         | 2  |
| CAP-D2 | 810  | LASNSKPAEGK     | 6  | CAP-D2 | 799  | LAEEVCcmNAISK | 10 |
| SMC4   | 410  | LEKQLQK         | 3  | SMC4   | 417  | DKEKVEELK     | 4  |
| CAP-D2 | 411  | LKDKSVVVVK      | 4  | CAP-D2 | 455  | LQEMKDR       | 5  |
| SMC4   | 400  | LKHAK           | 2  | SMC2   | 308  | VDAKVR        | 4  |
| SMC4   | 561  | LKKEELNAQDLVR   | 2  | SMC4   | 555  | ENKLEK        | 3  |
| SMC4   | 456  | LKQVMoxSSLQEETR | 2  | SMC2   | 789  | EIKNAQQK      | 3  |
| SMC4   | 456  | LKQVMoxSSLQEETR | 2  | SMC2   | 787  | GKEIKNAQQK    | 5  |
| SMC4   | 456  | LKQVMSSLQEETR   | 2  | SMC2   | 789  | EIKNAQQK      | 3  |
| SMC2   | 467  | LKYEEAEQEAHLAK  | 2  | SMC4   | 803  | LQKNVR        | 3  |
| CAP-D2 | 522  | LNYKNAVR        | 4  | CAP-D2 | 455  | LQEMKDR       | 5  |
| CAP-D2 | 522  | LNYKNAVR        | 4  | CAP-D2 | 530  | LTQKALCcmR    | 4  |
| SMC2   | 968  | LQKLLTK         | 3  | SMC2   | 975  | KEKLEK        | 3  |
| CAP-D2 | 439  | LSCcmSDLAEPLKK  | 11 | CAP-D2 | 455  | LQEMKDR       | 5  |
| CAP-D2 | 439  | LSCcmSDLAEPLKK  | 11 | CAP-D2 | 455  | LQEMoxKDR     | 5  |
| CAP-D2 | 530  | LTQKALCcmR      | 4  | CAP-D2 | 450  | KEVQK         | 1  |
| CAP-D2 | 530  | LTQKALCcmR      | 4  | SMC2   | 177  | KITAHK        | 1  |
| CAP-D2 | 530  | LTQKALCcmR      | 4  | CAP-D2 | 521  | KLNYK         | 1  |
| CAP-D2 | 530  | LTQKALCcmR      | 4  | CAP-D2 | 455  | LQEMKDR       | 5  |
| CAP-D2 | 530  | LTQKALCcmR      | 4  | CAP-D2 | 455  | LQEMoxKDR     | 5  |
| CAP-D2 | 530  | LTQKALCcmR      | 4  | SMC2   | 172  | MoxYECcmKK    | 5  |
| CAP-D2 | 530  | LTQKALCcmR      | 4  | SMC2   | 172  | MYECcmKK      | 5  |
| CAP-D2 | 530  | LTQKALCcmR      | 4  | SMC2   | 183  | TIEK          | 1  |

|        |      |                                  |   |        |     |                                 |    |
|--------|------|----------------------------------|---|--------|-----|---------------------------------|----|
| SMC2   | 439  | MDGSYKEDQEAFEAIR                 | 6 | SMC2   | 433 | QAEVKK                          | 5  |
| SMC2   | 439  | MoxDGSYKEDQEAFEAI<br>R           | 6 | SMC2   | 433 | QAEVKK                          | 5  |
| SMC2   | 792  | NAQQKLNSAK                       | 5 | SMC2   | 774 | ALENKMoxK                       | 5  |
| SMC4   | 434  | NISDATSKK                        | 8 | SMC4   | 443 | ELLEKAK                         | 5  |
| SMC4   | 434  | NISDATSKK                        | 8 | CAP-H  | 427 | FKPRHK                          | 2  |
| SMC2   | 511  | NPEKNWNPNCcmVK                   | 4 | SMC2   | 562 | ILEKGQLK                        | 4  |
| CAP-H  | 73   | QADASLPALSGWTNAQI<br>SEHYSACcmIK | 5 | CAP-G  | 400 | EFIGQQLILIIDCcmMo<br>xDTTEEGGRK | 17 |
| SMC4   | 852  | QKELEKVLNSYK                     | 6 | SMC4   | 864 | KDYER                           | 1  |
| SMC4   | 577  | QKVEEAK                          | 2 | SMC2   | 566 | GQLKHR                          | 4  |
| SMC2   | 740  | QQEDLLALKK                       | 9 | SMC2   | 732 | IQSAYHK                         | 6  |
| SMC2   | 740  | QQEDLLALKK                       | 9 | SMC2   | 438 | KMoxDGSYKEDQEAF<br>EAIR         | 1  |
| SMC2   | 740  | QQEDLLALKK                       | 9 | SMC2   | 750 | TIAECcmEETLKK                   | 10 |
| SMC2   | 740  | QQEDLLALKK                       | 9 | SMC2   | 424 | YAQQELKTK                       | 7  |
| CAP-G  | 489  | QQIKLAEIK                        | 4 | CAP-G  | 498 | VKLFEAK                         | 2  |
| SMC4   | 1094 | RKEELYLK                         | 2 | SMC2   | 209 | LKEAR                           | 2  |
| SMC4   | 1094 | RKEELYLK                         | 2 | CAP-D2 | 530 | LTQKALCcmR                      | 4  |
| SMC4   | 1094 | RKEELYLKR                        | 8 | SMC4   | 278 | GEKLN                           | 3  |
| CAP-D2 | 963  | SDSSTIK                          | 4 | CAP-D2 | 949 | ILREEEKT                        | 7  |
| CAP-H  | 476  | SILENQNVK                        | 1 | CAP-H  | 469 | AALTLK                          | 6  |
| SMC4   | 362  | SKALKDLEK                        | 2 | SMC4   | 354 | LADEMoxKSK                      | 6  |
| SMC4   | 493  | SKMDVAQAELDIYLTR                 | 2 | SMC2   | 411 | AATEAKQAQMK                     | 6  |
| SMC4   | 493  | SKMDVAQAELDIYLTR                 | 2 | SMC2   | 411 | AATEAKQAQMoxK                   | 6  |
| SMC4   | 493  | SKMoxDVAQAELDIYLT<br>R           | 2 | SMC2   | 411 | AATEAKQAQMK                     | 6  |
| SMC4   | 493  | SKMoxDVAQAELDIYLT<br>R           | 2 | SMC2   | 411 | AATEAKQAQMoxK                   | 6  |
| SMC4   | 4    | STKTSTAAHQK                      | 3 | SMC4   | 278 | GEKLN                           | 3  |

|        |      |                           |    |        |      |                             |    |
|--------|------|---------------------------|----|--------|------|-----------------------------|----|
| SMC2   | 248  | STNALKEAQANK              | 6  | SMC2   | 241  | AEEIKDR                     | 5  |
| SMC2   | 248  | STNALKEAQANK              | 6  | SMC2   | 261  | KIFESMAENЕК                 | 1  |
| CAP-H  | 229  | TAASFDECcmSTAGIFLT<br>SLR | 9  | SMC4   | 311  | MoxFKEKNHICcmQY<br>YIYDLQKR | 5  |
| SMC4   | 940  | TEKEIGDNEK                | 3  | SMC2   | 330  | LKELIK                      | 2  |
| SMC2   | 750  | TIAECcmEETLKK             | 10 | SMC2   | 767  | KAEEEYK                     | 1  |
| CAP-H  | 467  | TKAALTLSK                 | 2  | CAP-G  | 154  | DKFSNVR                     | 2  |
| CAP-H  | 467  | TKAALTLSK                 | 2  | SMC2   | 209  | LKEAR                       | 2  |
| CAP-D2 | 153  | TKASGFSWEDEREPLLR         | 2  | CAP-D2 | 137  | SGLVEVDPAGKNK               | 11 |
| SMC2   | 691  | TSQLEATEK                 | 7  | H2A.Z  | 1    | AGGKAGK                     | 4  |
| SMC2   | 691  | TSQLEATEK                 | 7  | SMC2   | 700  | ELANLKNMAEK                 | 6  |
| SMC2   | 691  | TSQLEATEKELANLK           | 9  | SMC2   | 682  | DAEDELKIK                   | 7  |
| SMC2   | 691  | TSQLEATEKELANLK           | 9  | SMC2   | 469  | YEEAEQEAHLAKK               | 12 |
| SMC4   | 7    | TSTAAHQKGR                | 8  | SMC4   | 278  | GEKLNР                      | 3  |
| CAP-G  | 883  | VKDKLCcmQR                | 4  | CAP-G  | 897  | KNLTK                       | 1  |
| SMC2   | 273  | VKELAQQIEETEK             | 2  | SMC4   | 1005 | KEALNIK                     | 1  |
| CAP-H  | 161  | VLGGLGKESAPTK             | 7  | SMC4   | 130  | AQKIR                       | 3  |
| CAP-H  | 161  | VLGGLGKESAPTK             | 7  | SMC2   | 188  | ESKLDEIR                    | 3  |
| CAP-H  | 161  | VLGGLGKESAPTK             | 7  | SMC4   | 278  | GEKLNР                      | 3  |
| CAP-H  | 161  | VLGGLGKESAPTK             | 7  | CAP-H  | 193  | VQTKK                       | 4  |
| SMC4   | 869  | VSEQAGKMESEVK             | 7  | SMC4   | 864  | KDYER                       | 1  |
| SMC4   | 869  | VSEQAGKMoxESEVK           | 7  | SMC4   | 864  | KDYER                       | 1  |
| SMC2   | 997  | YNDLMKK                   | 6  | SMC4   | 286  | MVEKEK                      | 4  |
| SMC2   | 997  | YNDLMKK                   | 6  | SMC4   | 284  | VKMVEK                      | 2  |
| SMC2   | 997  | YNDLMoxKK                 | 6  | SMC4   | 278  | GEKLNР                      | 3  |
| SMC4   | 1030 | YWQKEISK                  | 4  | SMC2   | 997  | YNDLMKK                     | 6  |
| SMC4   | 1030 | YWQKEISK                  | 4  | SMC2   | 997  | YNDLMoxKK                   | 6  |
| CAP-H  | 433  | SSADSEKENK                | 1  | CAP-H  | 427  | FKPR                        | 2  |
| CAP-G  | 218  | TMoxDVKEAVR               | 5  | CAP-H  | 427  | FKPR                        | 2  |

**SMC2/  
SMC4 SUB-  
COMPLEX**

| Protein1 | Peptide<br>Position<br>1 | Peptide 1                    | Pep 1<br>Link<br>pos | Protein2 | Peptide<br>Position<br>2 | Peptide 2     | Pep 2<br>Link<br>pos |
|----------|--------------------------|------------------------------|----------------------|----------|--------------------------|---------------|----------------------|
| SMC2     | 411                      | AATEAKQAQMK                  | 6                    | SMC2     | 422                      | LKYAQQELK     | 3                    |
| SMC2     | 411                      | AATEAKQAQMoxK                | 6                    | SMC2     | 422                      | LKYAQQELK     | 2                    |
| SMC2     | 241                      | AEEIKDR                      | 5                    | SMC2     | 248                      | STNALKEAQANKK | 6                    |
| SMC2     | 343                      | AFTSKEK                      | 5                    | SMC4     | 929                      | NLKK          | 3                    |
| SMC4     | 448                      | AKDKEEEKLK                   | 4                    | SMC4     | 434                      | NISDATSKK     | 8                    |
| SMC2     | 774                      | ALENKMK                      | 5                    | SMC2     | 787                      | GKEIK         | 2                    |
| SMC2     | 1028                     | ALHIAWEKVNK                  | 8                    | SMC4     | 278                      | GEKLNK        | 3                    |
| SMC4     | 364                      | ALKDLEK                      | 3                    | SMC2     | 885                      | TKDIK         | 2                    |
| SMC4     | 364                      | ALKDLEK                      | 3                    | SMC2     | 885                      | TKDIKAK       | 5                    |
| SMC2     | 618                      | AMoxEYVFGTTLVCcmSS<br>MDNAKK | 19                   | SMC2     | 638                      | VTFDKR        | 5                    |
| SMC4     | 130                      | AQKIR                        | 3                    | SMC4     | 278                      | GEKLNK        | 3                    |
| SMC4     | 919                      | AQVAIKTAHR                   | 6                    | SMC2     | 343                      | AFTSKEK       | 4                    |
| SMC4     | 919                      | AQVAIKTAHR                   | 6                    | SMC4     | 932                      | KSEDSVLR      | 1                    |
| SMC4     | 919                      | AQVAIKTAHR                   | 6                    | SMC4     | 929                      | NLKK          | 3                    |
| SMC2     | 214                      | ASYLEYQKMoxTR                | 8                    | SMC2     | 348                      | EKEIK         | 2                    |
| SMC2     | 214                      | ASYLEYQKMoxTR                | 8                    | SMC2     | 209                      | LKEAR         | 2                    |
| SMC2     | 214                      | ASYLEYQKMoxTR                | 8                    | SMC2     | 971                      | LLTKK         | 3                    |
| SMC2     | 214                      | ASYLEYQKMTR                  | 8                    | SMC2     | 209                      | LKEAR         | 2                    |
| SMC4     | 450                      | DKEEEKLK                     | 6                    | SMC4     | 443                      | ELLEKAK       | 5                    |
| SMC4     | 367                      | DLEKK                        | 4                    | SMC4     | 362                      | SKALK         | 2                    |
| SMC4     | 521                      | EALMoxTTSETLKQR              | 11                   | SMC4     | 535                      | AAIKDIDIK     | 4                    |

|      |      |                         |    |      |     |                |    |
|------|------|-------------------------|----|------|-----|----------------|----|
| SMC4 | 521  | EALMoxTTSETLKQR         | 11 | SMC4 | 534 | KAAIK          | 1  |
| SMC4 | 521  | EALMoxTTSETLKQR         | 11 | SMC4 | 831 | LKGQVK         | 2  |
| SMC4 | 521  | EALMTTSETLKQR           | 11 | SMC4 | 535 | AAIKDIDIK      | 4  |
| SMC4 | 521  | EALMTTSETLKQR           | 11 | SMC4 | 534 | KAAIK          | 1  |
| SMC4 | 521  | EALMTTSETLKQR           | 11 | SMC4 | 831 | LKGQVK         | 2  |
| SMC4 | 1096 | EELYLKR                 | 6  | SMC4 | 278 | GEKLNK         | 3  |
| SMC4 | 475  | EGKEKELMEFCcmK          | 5  | SMC4 | 469 | EIQKEK         | 4  |
| SMC4 | 478  | EKELMEFCcmK             | 2  | SMC2 | 779 | MKNAEAER       | 2  |
| SMC4 | 478  | EKELMEFCcmK             | 2  | SMC2 | 779 | MoxKNAEAER     | 2  |
| SMC4 | 478  | EKELMoxEFCcmK           | 2  | SMC2 | 779 | MKNAEAER       | 2  |
| SMC4 | 478  | EKELMoxEFCcmK           | 2  | SMC2 | 779 | MoxKNAEAER     | 2  |
| SMC4 | 478  | EKELMoxEFCcmKTVND<br>AR | 2  | SMC2 | 779 | MKNAEAER       | 2  |
| SMC4 | 478  | EKELMoxEFCcmKTVND<br>AR | 10 | SMC2 | 779 | MoxKNAEAER     | 2  |
| SMC4 | 398  | EKLKHAK                 | 4  | SMC2 | 308 | VDAKVR         | 4  |
| SMC2 | 458  | EKLQDEM                 | 2  | SMC4 | 534 | KAAIK          | 1  |
| SMC2 | 700  | ELANLKNMAEK             | 6  | SMC4 | 803 | LQKNVR         | 3  |
| SMC2 | 700  | ELANLKNMoxAEK           | 6  | SMC4 | 803 | LQKNVR         | 3  |
| SMC2 | 275  | ELAQQIEETEK             | 9  | SMC2 | 286 | KNNEEFGAK      | 1  |
| SMC4 | 854  | ELEKVLNSYK              | 4  | SMC4 | 864 | KDYER          | 1  |
| SMC2 | 332  | ELIKIMQEEFK             | 4  | SMC4 | 940 | TEKEIGDNEK     | 3  |
| SMC4 | 480  | ELMEFCcmKTVNDAR         | 8  | SMC2 | 779 | MoxKNAEAER     | 2  |
| SMC4 | 480  | ELMoxEFCcmKTVNDAR       | 8  | SMC2 | 779 | MKNAEAER       | 2  |
| SMC4 | 480  | ELMoxEFCcmKTVNDAR       | 8  | SMC2 | 779 | MoxKNAEAER     | 2  |
| SMC2 | 851  | EQVSALEAEAVKTR          | 12 | SMC2 | 865 | ESLKNAENELSSEK | 4  |
| SMC2 | 851  | EQVSALEAEAVKTR          | 13 | SMC2 | 308 | VDAKVR         | 4  |
| SMC2 | 188  | ESKLDEIRR               | 3  | SMC4 | 278 | GEKLNK         | 3  |
| SMC2 | 865  | ESLKNAENELSSEK          | 4  | SMC4 | 386 | FTQLDLQDVKVR   | 10 |
| SMC2 | 963  | ETGQKLQK                | 5  | SMC2 | 971 | LLTKK          | 4  |

|      |     |                           |    |      |      |                |    |
|------|-----|---------------------------|----|------|------|----------------|----|
| SMC2 | 507 | FEYKNPEK                  | 4  | SMC2 | 562  | ILEKGQLK       | 4  |
| SMC4 | 386 | FTQLDLQDVKVR              | 10 | SMC4 | 398  | EKLK           | 2  |
| SMC4 | 386 | FTQLDLQDVKVR              | 10 | SMC2 | 865  | ESLKNAENELSSEK | 4  |
| SMC4 | 386 | FTQLDLQDVKVR              | 10 | SMC2 | 320  | KQNLNSEENR     | 1  |
| SMC4 | 738 | GEIIEQSGTMTGGGGKV<br>MK   | 16 | SMC4 | 577  | QKVEEAK        | 2  |
| SMC4 | 738 | GEIIEQSGTMTGGGGKV<br>MoxK | 16 | SMC4 | 577  | QKVEEAK        | 2  |
| SMC4 | 278 | GEKLNK                    | 3  | SMC4 | 130  | AQKIR          | 3  |
| SMC4 | 278 | GEKLNK                    | 3  | SMC2 | 188  | ESKLDEIRR      | 2  |
| SMC4 | 278 | GEKLNK                    | 3  | SMC4 | 1095 | KEELYLKR       | 7  |
| SMC4 | 278 | GEKLNK                    | 3  | SMC4 | 1094 | RKEELYLKR      | 8  |
| SMC4 | 278 | GEKLNK                    | 3  | SMC2 | 997  | YNDLMoxKK      | 6  |
| SMC2 | 566 | GQLKHR                    | 4  | SMC4 | 577  | QKVEEAK        | 2  |
| SMC4 | 372 | IDKITVLIENKNK             | 3  | SMC4 | 367  | DLEKK          | 4  |
| SMC2 | 262 | IFESMAENEKK               | 10 | SMC2 | 273  | VKELAQQIEETEEK | 13 |
| SMC2 | 197 | IITEEISPTLEK              | 7  | SMC2 | 209  | LKEAR          | 2  |
| SMC2 | 197 | IITEEISPTLEKLNK           | 12 | SMC4 | 278  | GEKLNK         | 3  |
| SMC2 | 197 | IITEEISPTLEKLNK           | 12 | SMC4 | 1095 | KEELYLK        | 1  |
| SMC2 | 354 | IKEGLNGLQEESKK            | 2  | SMC2 | 348  | EKEIK          | 2  |
| SMC2 | 354 | IKEGLNGLQEESKK            | 2  | SMC2 | 348  | EKEIKK         | 2  |
| SMC2 | 562 | ILEKGQLK                  | 4  | SMC2 | 507  | FEYKNPEK       | 4  |
| SMC2 | 336 | IMoxQEEFKAFTSK            | 7  | SMC2 | 348  | EKEIK          | 2  |
| SMC2 | 336 | IMoxQEEFKAFTSK            | 7  | SMC2 | 348  | EKEIKK         | 5  |
| SMC2 | 336 | IMoxQEEFKAFTSK            | 7  | SMC2 | 975  | KEKLEK         | 1  |
| SMC2 | 336 | IMoxQEEFKAFTSK            | 7  | SMC2 | 330  | LKELIK         | 2  |
| SMC2 | 336 | IMQEEFKAFTSK              | 7  | SMC2 | 348  | EKEIK          | 2  |
| SMC2 | 336 | IMQEEFKAFTSK              | 7  | SMC2 | 348  | EKEIKK         | 5  |
| SMC2 | 336 | IMQEEFKAFTSK              | 7  | SMC2 | 975  | KEKLEK         | 1  |
| SMC2 | 336 | IMQEEFKAFTSK              | 7  | SMC2 | 330  | LKELIK         | 2  |

|      |      |                 |   |      |      |                  |    |
|------|------|-----------------|---|------|------|------------------|----|
| SMC2 | 732  | IQQSAYHK        | 4 | SMC2 | 433  | QAEVKK           | 5  |
| SMC4 | 534  | KAAlK           | 1 | SMC4 | 831  | LKGQVK           | 2  |
| SMC2 | 767  | KAEEEEYK        | 1 | SMC2 | 774  | ALENKMK          | 5  |
| SMC2 | 767  | KAEEEEYK        | 1 | SMC2 | 774  | ALENKMoxK        | 5  |
| SMC2 | 767  | KAEEEEYKALENK   | 7 | SMC2 | 779  | MKNAEAER         | 2  |
| SMC4 | 563  | KEELNAQDLVR     | 1 | SMC4 | 553  | EKENKLEK         | 5  |
| SMC4 | 563  | KEELNAQDLVR     | 1 | SMC4 | 555  | ENKLEKLLK        | 6  |
| SMC4 | 563  | KEELNAQDLVR     | 1 | SMC4 | 558  | LEKLLK           | 3  |
| SMC4 | 1095 | KEELYLKR        | 7 | SMC4 | 278  | GEKLNK           | 3  |
| SMC2 | 261  | KIFESMoxAENEK   | 1 | SMC2 | 248  | STNALKEAQANKK    | 6  |
| SMC2 | 353  | KIKEGLNGLQEESK  | 3 | SMC2 | 348  | EKEIK            | 2  |
| SMC2 | 353  | KIKEGLNGLQEESKK | 3 | SMC2 | 348  | EKEIK            | 2  |
| SMC2 | 481  | KKQLSSEISSLR    | 2 | SMC4 | 803  | LQKNVR           | 3  |
| SMC4 | 675  | KNLQK           | 1 | SMC2 | 637  | KVTFDKR          | 6  |
| SMC2 | 286  | KNNEEFGAK       | 1 | SMC2 | 275  | ELAQQIEETEK      | 9  |
| SMC2 | 482  | KQLSSEISSLR     | 1 | SMC4 | 786  | AVQCcmEEEEKFQLEE | 8  |
|      |      |                 |   |      |      | DITK             |    |
| SMC2 | 482  | KQLSSEISSLR     | 1 | SMC2 | 700  | ELANLKNMoxAEK    | 6  |
| SMC2 | 482  | KQLSSEISSLR     | 1 | SMC4 | 803  | LQKNVR           | 3  |
| SMC2 | 482  | KQLSSEISSLR     | 1 | SMC2 | 469  | YEEAEQEAHLAKK    | 12 |
| SMC2 | 320  | KQNLNSENK       | 1 | SMC4 | 386  | FTQLDLQDVKVR     | 10 |
| SMC4 | 932  | KSEDSVLR        | 1 | SMC4 | 417  | DKEKVEELK        | 4  |
| SMC4 | 354  | LADEMKS         | 6 | SMC4 | 364  | ALKDLEK          | 3  |
| SMC4 | 354  | LADEMKS         | 6 | SMC4 | 362  | SKALK            | 2  |
| SMC4 | 354  | LADEMoxKS       | 6 | SMC4 | 364  | ALKDLEK          | 3  |
| SMC4 | 354  | LADEMoxKS       | 6 | SMC4 | 362  | SKALK            | 2  |
| SMC4 | 354  | LADEMoxKS       | 6 | SMC4 | 362  | SKALKDLEK        | 2  |
| SMC4 | 410  | LEKQLQK         | 3 | SMC4 | 417  | DKEKVEELK        | 4  |
| SMC2 | 209  | LKEAR           | 2 | SMC4 | 1094 | RKEELYLK         | 2  |
| SMC4 | 561  | LKKEELNAQDLVR   | 2 | SMC4 | 728  | DKRWR            | 2  |

|      |     |                           |    |      |     |                |   |
|------|-----|---------------------------|----|------|-----|----------------|---|
| SMC4 | 561 | LKKEELNAQDLVR             | 3  | SMC4 | 553 | EKENKLEK       | 5 |
| SMC4 | 561 | LKKEELNAQDLVR             | 3  | SMC4 | 555 | ENKLEK         | 3 |
| SMC4 | 456 | LKQVMSSLQEETR             | 2  | SMC2 | 787 | GKEIKNAQQK     | 5 |
| SMC4 | 456 | LKQVMSSLQEETR             | 2  | SMC2 | 802 | KKADDSSR       | 1 |
| SMC2 | 422 | LKYAQQELK                 | 2  | SMC2 | 411 | AATEAKQAQMK    | 6 |
| SMC2 | 422 | LKYAQQELK                 | 3  | SMC2 | 411 | AATEAKQAQMoxK  | 6 |
| SMC2 | 422 | LKYAQQELK                 | 3  | SMC4 | 850 | NKQK           | 2 |
| SMC2 | 467 | LKYEEAEQEHLAK             | 2  | SMC2 | 706 | NMoxAEKYQHLK   | 6 |
| SMC2 | 467 | LKYEEAEQEHLAK             | 2  | SMC2 | 711 | YQHLKQQWEMoxK  | 5 |
| SMC4 | 544 | LPTAEQELKEK               | 9  | SMC4 | 558 | LEKLEK         | 3 |
| SMC2 | 548 | LYNIVVDTEATGK             | 11 | SMC2 | 561 | KILEKGQLK      | 1 |
| SMC2 | 548 | LYNIVVDTEATGKK            | 13 | SMC2 | 562 | ILEKGQLK       | 4 |
| SMC2 | 439 | MoxDGSYKEDQEAFAI<br>RK    | 6  | SMC2 | 433 | QAEVKK         | 5 |
| SMC2 | 779 | MoxKNAEAER                | 2  | SMC2 | 767 | KAEEEEYKALENK  | 6 |
| SMC2 | 873 | NAENELSSEKGLMAER          | 10 | SMC2 | 885 | TKDIK          | 2 |
| SMC2 | 792 | NAQQKLNSAK                | 5  | SMC2 | 787 | GKEIK          | 2 |
| SMC2 | 792 | NAQQKLNSAK                | 5  | SMC2 | 803 | KADDSSR        | 6 |
| SMC2 | 792 | NAQQKLNSAK                | 8  | SMC2 | 802 | KKADDSSR       | 2 |
| SMC4 | 434 | NISDATSKK                 | 8  | SMC4 | 448 | AKDKEEEKLEK    | 4 |
| SMC2 | 830 | QEQASYKQQSEAAQQAI<br>ASLK | 7  | SMC2 | 336 | IMoxQEEFKAFTSK | 7 |
| SMC4 | 577 | QKVEEAK                   | 2  | SMC2 | 566 | GQLKHR         | 4 |
| SMC4 | 577 | QKVEEAK                   | 2  | SMC4 | 584 | SSLAQHR        | 2 |
| SMC4 | 17  | QPIEEPAGDMoxQVEKQ<br>DGR  | 14 | SMC4 | 278 | GEKLEK         | 3 |
| SMC4 | 17  | QPIEEPAGDMQVEKQDG<br>R    | 14 | SMC4 | 130 | AQKIR          | 3 |
| SMC4 | 17  | QPIEEPAGDMQVEKQDG<br>R    | 14 | SMC4 | 278 | GEKLEK         | 3 |



|      |      |                    |    |      |      |                 |    |
|------|------|--------------------|----|------|------|-----------------|----|
| SMC2 | 740  | QQEDLLALKK         | 9  | SMC2 | 424  | YAQQELKTK       | 8  |
| SMC4 | 1094 | RKEELYLKR          | 8  | SMC4 | 278  | GEKLNK          | 3  |
| SMC2 | 314  | SDLKHR             | 1  | SMC2 | 308  | VDAKVR          | 4  |
| SMC2 | 314  | SDLKHRK            | 1  | SMC2 | 308  | VDAKVR          | 4  |
| SMC2 | 4    | SIVLEGFKSYAQR      | 8  | SMC4 | 130  | AQKIR           | 3  |
| SMC4 | 362  | SKALKDLEK          | 2  | SMC4 | 354  | LADEMKS         | 6  |
| SMC4 | 493  | SKMDVAQAELDIYLTR   | 2  | SMC2 | 411  | AATEAKQAQMK     | 6  |
| SMC4 | 493  | SKMDVAQAELDIYLTR   | 2  | SMC2 | 411  | AATEAKQAQMoxK   | 3  |
| SMC4 | 493  | SKMoxDVAQAELDIYLTR | 2  | SMC2 | 411  | AATEAKQAQMoxK   | 3  |
|      |      | R                  |    |      |      |                 |    |
| SMC4 | 351  | SSKLADEMK          | 3  | SMC4 | 343  | ETKDINEK        | 3  |
| SMC4 | 351  | SSKLADEMK          | 3  | SMC4 | 360  | SKSK            | 3  |
| SMC4 | 584  | SSLAQHR            | 2  | SMC4 | 754  | VMKGR           | 3  |
| SMC4 | 584  | SSLAQHR            | 2  | SMC4 | 754  | VMoxKGR         | 3  |
| SMC2 | 248  | STNALKEAQANK       | 6  | SMC2 | 241  | AEEIKDR         | 5  |
| SMC2 | 248  | STNALKEAQANKK      | 12 | SMC2 | 241  | AEEIKDR         | 5  |
| SMC4 | 1270 | SVATNPK            | 1  | SMC4 | 1264 | THNTTK          | 5  |
| SMC2 | 885  | TKDIKAK            | 5  | SMC4 | 364  | ALKDLEK         | 3  |
| SMC2 | 885  | TKDIKAK            | 5  | SMC2 | 895  | IEKYR           | 3  |
| SMC2 | 1158 | TKFVDGISTVSR       | 2  | SMC4 | 130  | AQKIR           | 3  |
| SMC2 | 1158 | TKFVDGISTVSR       | 2  | SMC4 | 278  | GEKLNK          | 3  |
| SMC2 | 1158 | TKFVDGISTVSR       | 1  | SMC2 | 209  | LKEAR           | 2  |
| SMC4 | 897  | TQQDKVDKINQEIDECc  | 8  | SMC4 | 448  | AKDKEEEK        | 4  |
|      |      | mTSAITK            |    |      |      |                 |    |
| SMC4 | 897  | TQQDKVDKINQEIDECc  | 8  | SMC4 | 434  | NISDATSKK       | 8  |
|      |      | mTSAITK            |    |      |      |                 |    |
| SMC2 | 691  | TSQLEATEKELANLK    | 9  | SMC2 | 467  | LKYEEAEQEAHLAKK | 14 |
| SMC2 | 691  | TSQLEATEKELANLK    | 9  | SMC2 | 469  | YEEAEQEAHLAKK   | 12 |
| SMC2 | 308  | VDAKVR             | 4  | SMC4 | 400  | LKHAK           | 2  |
| SMC4 | 695  | VEDKSFSPAFYFALR    | 7  | SMC4 | 675  | KNLQK           | 1  |

|      |      |                               |    |      |      |            |   |
|------|------|-------------------------------|----|------|------|------------|---|
| SMC2 | 273  | VKELAQQIEETEK                 | 11 | SMC2 | 286  | KNNEEFGAK  | 1 |
| SMC2 | 273  | VKELAQQIEETEEK                | 2  | SMC4 | 1005 | KEALNIK    | 1 |
| SMC4 | 284  | VKMVEK                        | 2  | SMC4 | 278  | GEKLNK     | 3 |
| SMC4 | 869  | VSEQAGKMESEVK                 | 10 | SMC4 | 473  | EKEGKEK    | 2 |
| SMC4 | 869  | VSEQAGKMESEVK                 | 7  | SMC4 | 864  | KDYER      | 3 |
| SMC4 | 869  | VSEQAGKMESEVKR                | 7  | SMC4 | 473  | EKEGK      | 2 |
| SMC4 | 869  | VSEQAGKMESEVKR                | 13 | SMC4 | 864  | KDYER      | 1 |
| SMC4 | 869  | VSEQAGKMoxESEVK               | 10 | SMC4 | 864  | KDYER      | 1 |
| SMC4 | 869  | VSEQAGKMoxESEVKR              | 13 | SMC4 | 475  | EGKEK      | 3 |
| SMC4 | 869  | VSEQAGKMoxESEVKR              | 13 | SMC4 | 864  | KDYER      | 1 |
| SMC2 | 424  | YAQQELKTK                     | 8  | SMC2 | 740  | QQEDLLALKK | 9 |
| SMC2 | 997  | YNDLMKK                       | 6  | SMC4 | 278  | GEKLNK     | 3 |
| SMC2 | 997  | YNDLMoxKK                     | 6  | SMC4 | 278  | GEKLNK     | 3 |
| SMC2 | 997  | YNDLMoxKK                     | 6  | SMC4 | 1030 | YWQKEISK   | 4 |
| SMC4 | 509  | YNTAVSQLDEAKEALMo<br>xTTSETLK | 12 | SMC4 | 831  | LKGQVK     | 2 |
| SMC2 | 711  | YQHLKQQWEMoxK                 | 5  | SMC4 | 803  | LQKNVR     | 3 |
| SMC2 | 919  | YQQTADASSTLDKLLK              | 14 | SMC2 | 936  | EYKWIASEK  | 3 |
| SMC4 | 817  | YTASIQSFSEQEIR                | 1  | SMC4 | 812  | NTLEK      | 2 |
| SMC2 | 572  | YTIPLSK                       | 1  | SMC4 | 577  | QKVEEAK    | 2 |
| SMC4 | 1030 | YWQKEISK                      | 4  | SMC2 | 997  | YNDLMKK    | 6 |
| SMC4 | 1030 | YWQKEISK                      | 7  | SMC2 | 997  | YNDLMoxKK  | 6 |

### IN SITU LINKAGES

| Protein1 | Peptide<br>Position<br>1 | Peptide 1 | Pep 1<br>Link<br>pos | Protein2 | Peptide<br>Position<br>2 | Peptide 2 | Pep 2<br>Link<br>pos |
|----------|--------------------------|-----------|----------------------|----------|--------------------------|-----------|----------------------|
|----------|--------------------------|-----------|----------------------|----------|--------------------------|-----------|----------------------|

|            |     |                              |    |                    |      |               |    |
|------------|-----|------------------------------|----|--------------------|------|---------------|----|
| CAP-H      | 2   | AVTPR                        | 3  | CAP-H              | 0    | MRAVTPRRGGR   | 1  |
| CAP-G      | 248 | VKLLQQGLNDR                  | 2  | CAP-G              | 210  | TLPKIVGR      | 4  |
| SMC4       | 386 | FTQLDLQDVKVR                 | 10 | SMC2               | 320  | KQNLNSEENR    | 1  |
| SMC4       | 532 | QRKAAIKDIDIK                 | 7  | SMC2               | 566  | GQLKHR        | 4  |
| SMC4       | 78  | LMoxITHIVNQNFK               | 4  | SMC4               | 90   | SYAGEQTLGPFHK | 2  |
| SMC4       | 897 | TQQDKVDKINQEIDECc<br>mTSAITK | 5  | SMC4               | 434  | NISDATSKK     | 8  |
| SMC4       | 695 | VEDKSFSPAFYFALR              | 4  | SMC4               | 676  | NLQKIPTPENAPR | 7  |
| SMC2       | 197 | IITEEISPTLEKLK               | 12 | CAP-H              | 161  | VLGGLGKESAPTK | 2  |
| SMC2       | 411 | AATEAKQAQMK                  | 6  | SMC2               | 422  | LKYAQQELK     | 4  |
| SMC2       | 507 | FEYKNPEK                     | 4  | SMC2               | 562  | ILEKGQLK      | 4  |
| SMC2       | 792 | NAQQKLNSAK                   | 5  | SMC2               | 787  | GKEIK         | 2  |
| SMC2       | 424 | YAQQELKTK                    | 7  | SMC2               | 740  | QQEDLLALKK    | 2  |
| SMC2       | 197 | IITEEISPTLEK                 | 9  | SMC2               | 209  | LKEAR         | 10 |
| SMC2       | 865 | ESLKNAENELSSEK               | 4  | SMC4               | 386  | FTQLDLQDVKVR  | 1  |
| Histone H4 | 80  | TVTAMDVVYALK                 | 3  | CAP-D2             | 1380 | RTALR         | 2  |
| Histone H4 | 24  | DNIQGITKPAIR                 | 8  | CAP-D2             | 1380 | RTALR         | 2  |
| Histone H4 | 80  | TVTAMoxDVVYALKR              | 12 | Histone<br>H2A-III | 36   | KGNYAER       | 1  |
| Histone H4 | 56  | GVLKVFLENVIR                 | 4  | Histone<br>H2A-III | 4    | GKQGGK        | 2  |
| Histone H4 | 24  | DNIQGITKPAIR                 | 8  | Histone<br>H4      | 24   | DNIQGITKPAIR  | 7  |
| Histone H4 | 24  | DNIQGITKPAIR                 | 8  | Histone<br>H4      | 6    | GGKGLGK       | 3  |
| Histone H4 | 24  | DNIQGITKPAIR                 | 8  | Histone<br>H4      | 37   | LARRGGVKR     | 8  |
| Histone H4 | 24  | DNIQGITKPAIR                 | 8  | Histone<br>H4      | 9    | GLGKGGAK      | 4  |

|                 |     |                          |    |                 |     |            |   |
|-----------------|-----|--------------------------|----|-----------------|-----|------------|---|
| Histone H4      | 24  | DNIQGITKPAIR             | 8  | Histone H4      | 13  | GGAKR      | 4 |
| Histone H4      | 56  | GVLKVFLNVIR              | 4  | Histone H4      | 6   | GGKGLGK    | 3 |
| Histone H4      | 56  | GVLKVFLNVIR              | 4  | Histone H4      | 4   | GKGGK      | 2 |
| Histone H4      | 56  | GVLKVFLNVIR              | 4  | Histone H4      | 9   | GLGKGGAK   | 4 |
| Histone H4      | 79  | KTVTAMDVVYALK            | 1  | Histone H4      | 6   | GGKGLGK    | 3 |
| Histone H4      | 80  | TVTAMDVVYALKR            | 12 | Histone H4      | 41  | GGVKR      | 4 |
| Histone H2A-III | 100 | VTIAQGGVLPNIQAVLLP<br>KK | 19 | Histone H2A-III | 120 | TDSHK      | 1 |
| Histone H2A-III | 4   | GKQGGK                   | 2  | Histone H2A.Z   | 5   | AGKDSGK    | 3 |
| Histone H2A-III | 89  | NDEELNKLLGK              | 7  | Histone H4      | 9   | GLGKGGAK   | 4 |
| Histone H2A-III | 89  | NDEELNKLLGK              | 7  | Histone H4      | 6   | GGKGLGK    | 3 |
| Histone H2A-III | 89  | NDEELNKLLGK              | 7  | Histone H4      | 4   | GKGGK      | 2 |
| Histone H2A-III | 100 | VTIAQGGVLPNIQAVLLP<br>KK | 19 | Histone H4      | 13  | GGAKR      | 4 |
| Histone H2A-III | 100 | VTIAQGGVLPNIQAVLLP<br>KK | 19 | Histone H4      | 41  | GGVKR      | 4 |
| Histone H2A-III | 100 | VTIAQGGVLPNIQAVLLP<br>KK | 19 | SMC2            | 58  | ASSLQDLVYK | 9 |
| Histone H2A-III | 100 | VTIAQGGVLPNIQAVLLP<br>KK | 19 | SMC4            | 605 | SGSISGIHGR | 3 |

**COHESIN  
COMPLEX**

| Protein1 | Peptide<br>Position<br>1 | Peptide 1               | Pep 1<br>Link<br>pos | Protein2 | Peptide<br>Position<br>2 | Peptide 2      | Pep 2<br>Link<br>pos |
|----------|--------------------------|-------------------------|----------------------|----------|--------------------------|----------------|----------------------|
| SMC3     | 308                      | AKDLQDELAGNSEQR         | 2                    | SMC1     | 294                      | RPQYIKAK       | 6                    |
| SMC3     | 236                      | AKLDELSAK               | 2                    | SMC1     | 968                      | SSSLYAR        | 5                    |
| SMC3     | 236                      | AKLDELSAKR              | 9                    | SMC3     | 246                      | ETSGEKS        | 6                    |
| RAD21    | 70                       | AKYLLADCcmNEAFIK        | 2                    | SMC3     | 186                      | EKINELLK       | 2                    |
| SMC1     | 218                      | AQVQLQLFKLYHNEAEI<br>EK | 9                    | SMC1     | 918                      | LEQKR          | 4                    |
| RAD21    | 390                      | CcmLTPLVPEDLR           | 3                    | RAD21    | 383                      | LLKLFTR        | 3                    |
| SMC1     | 554                      | DCcmIQYIKEQR            | 7                    | SMC3     | 661                      | GALTGGYYDTR    | 7                    |
| SMC1     | 62                       | DLIHGAPVGKPPASNR        | 10                   | SMC1     | 96                       | LIVGSSSEYKINNR | 10                   |
| SMC1     | 62                       | DLIHGAPVGKPPASNR        | 10                   | SMC1     | 13                       | SYKGR          | 3                    |
| SMC1     | 62                       | DLIHGAPVGKPPASNR        | 10                   | SMC1     | 57                       | VKALR          | 2                    |
| SMC1     | 363                      | DLTLEENQVKK             | 10                   | SMC1     | 377                      | LKEEASKR       | 7                    |
| SMC3     | 15                       | DQTIVDPFSSKHNIVVGR      | 11                   | SMC3     | 0                        | MoxYIK         | 1                    |
| SMC3     | 15                       | DQTIVDPFSSKHNIVVGR      | 11                   | SMC3     | 1099                     | VSFTGKQGEMoxR  | 6                    |
| SMC3     | 397                      | ELKSLDQAINDK            | 3                    | SMC3     | 391                      | DKWIKK         | 5                    |
| SMC3     | 895                      | ELQKSMoxER              | 4                    | SMC1     | 255                      | MoxDRVEDELKDR  | 9                    |
| SMC1     | 338                      | EMGAVEKAR               | 7                    | SMC1     | 807                      | LEFENQKTR      | 7                    |
| SMC1     | 338                      | EMoxGAVEKAR             | 7                    | SMC1     | 807                      | LEFENQKTR      | 7                    |
| SMC1     | 173                      | EMoxVKAEEEDTQFNHYHR     | 4                    | SMC1     | 160                      | SGELAQEYDKR    | 10                   |
| SMC1     | 910                      | EVTAIETKLEQK            | 8                    | SMC3     | 928                      | QGMoxLLKK      | 6                    |
| SA-2     | 976                      | FALTFGLDQLKTR           | 11                   | SA-2     | 930                      | QIDKIQCcmAK    | 4                    |

|       |      |                           |    |       |      |               |    |
|-------|------|---------------------------|----|-------|------|---------------|----|
| SMC3  | 661  | GALTGGYYDTR               | 7  | SMC1  | 554  | DCcmIQYIKEQR  | 7  |
| SMC1  | 858  | HMoxKIIDETMAQLQDL<br>K    | 3  | SMC1  | 853  | KEEQR         | 1  |
| SMC1  | 858  | HMoxKIIDETMoxAQLQD<br>LK  | 3  | SMC1  | 853  | KEEQR         | 1  |
| SMC1  | 858  | HMoxKIIDETMoxAQLQD<br>LK  | 3  | SMC1  | 851  | LKKEEQR       | 3  |
| SMC1  | 434  | IEKLEEYIATSK              | 3  | SMC1  | 426  | EIEENQKR      | 7  |
| SMC3  | 818  | IKLEGIITR                 | 2  | SMC3  | 355  | EKEER         | 2  |
| SMC3  | 818  | IKLEGIITR                 | 2  | SMC3  | 336  | IEEKQK        | 4  |
| RAD21 | 84   | IKMAFRPGVVDLPEENR         | 2  | SMC3  | 186  | EKINELLK      | 2  |
| RAD21 | 84   | IKMoxAFRPGVVDLPEEN<br>R   | 2  | SMC3  | 186  | EKINELLK      | 2  |
| SA-2  | 769  | ITESSSTKEDLLR             | 8  | SA-2  | 784  | KQMoxR        | 1  |
| SMC3  | 683  | KAEEELGELEAK              | 1  | SMC3  | 492  | KQQLLR        | 1  |
| SMC3  | 683  | KAEEELGELEAK              | 1  | SMC3  | 675  | LELQKDVR      | 5  |
| SMC3  | 683  | KAEEELGELEAK              | 1  | SMC3  | 673  | SRLELQKDVR    | 7  |
| SMC3  | 683  | KAEEELGELEAKLNENL<br>R    | 12 | SMC3  | 474  | EENAEQQALAAKR | 12 |
| SMC3  | 984  | KALDQFVNFSEQK             | 1  | SMC1  | 211  | LKDEVVR       | 2  |
| SMC1  | 843  | KDEAEIEK                  | 1  | SMC1  | 302  | ENTAHKIK      | 6  |
| SMC1  | 843  | KDEAEIEKLNENL             | 8  | SMC1  | 853  | KEEQR         | 1  |
| SMC3  | 171  | KEESISLMoxK               | 1  | SMC1  | 172  | KEMoxVK       | 1  |
| SMC3  | 171  | KEESISLMoxK               | 1  | SMC3  | 155  | LKLLR         | 2  |
| SMC3  | 1058 | KGDVEGSQSQDEGEGST<br>ESER | 1  | SMC3  | 1024 | KYEAQLTFKQVSK | 10 |
| RAD21 | 404  | KGGEADNLDEFLK             | 1  | RAD21 | 383  | LLKLFTR       | 3  |
| RAD21 | 404  | KGGEADNLDEFLK             | 1  | RAD21 | 383  | LLKLFTR       | 3  |
| SMC1  | 412  | KKVETEA                   | 2  | SMC1  | 747  | INDIKR        | 5  |
| RAD21 | 321  | KLIVDSVK                  | 1  | RAD21 | 329  | ELDSKTIR      | 5  |

|       |      |                   |    |       |      |               |   |
|-------|------|-------------------|----|-------|------|---------------|---|
| SA-2  | 575  | KTQLDDR           | 1  | SA-2  | 568  | VLTAKEK       | 5 |
| SA-2  | 575  | KTQLDDRTK         | 1  | SA-2  | 568  | VLTAKEK       | 5 |
| SMC1  | 413  | KVETEAK           | 1  | SMC1  | 747  | INDIKR        | 5 |
| SMC3  | 453  | KYYEVKNKKDELQSER  | 9  | SMC1  | 268  | ELGKMMoxR     | 4 |
| SMC3  | 436  | LDQDLNEVKAR       | 9  | SMC3  | 740  | MoxLKEK       | 3 |
| SMC1  | 807  | LEFENQKTR         | 7  | SMC1  | 338  | EMoxGAVEKAR   | 7 |
| SMC1  | 807  | LEFENQKTR         | 7  | SMC3  | 336  | IEEKQK        | 4 |
| SMC1  | 807  | LEFENQKTR         | 7  | SMC3  | 818  | IKLEGIITR     | 2 |
| SA-2  | 626  | LEKHLDALLR        | 3  | SA-2  | 563  | GTGKR         | 4 |
| SMC3  | 675  | LELQKDVR          | 5  | SMC3  | 492  | KQQLLR        | 1 |
| SMC1  | 5    | LIEIENFKSYK       | 8  | SA-2  | 276  | IIGKR         | 4 |
| SMC1  | 211  | LKDEVVR           | 2  | SMC1  | 934  | MoxQDIKLPLSK  | 5 |
| SMC1  | 211  | LKDEVVR           | 2  | SMC3  | 978  | YSHVNKK       | 6 |
| SMC1  | 377  | LKEEASKR          | 2  | SMC1  | 763  | DLKEK         | 3 |
| SMC1  | 377  | LKEEASKR          | 7  | SMC1  | 373  | KYHR          | 1 |
| SMC3  | 155  | LKLLR             | 2  | SMC1  | 57   | VKALR         | 2 |
| RAD21 | 383  | LLKLFTR           | 3  | RAD21 | 329  | ELDSKTIR      | 5 |
| SMC3  | 1046 | LVPGGKATLVMK      | 6  | SMC3  | 1099 | VSFTGKQGEMoxR | 6 |
| SMC1  | 227  | LYHNEAEIEKLNK     | 10 | SMC1  | 918  | LEQKR         | 4 |
| SMC1  | 255  | MoxDRVEDELKDR     | 9  | SMC1  | 275  | EQQIEKEIK     | 7 |
| SMC1  | 934  | MoxQDIKLPLSK      | 5  | SMC1  | 211  | LKDEVVR       | 2 |
| SMC1  | 934  | MQDIKLPLSK        | 5  | SMC1  | 211  | LKDEVVR       | 2 |
| SMC3  | 459  | NKKDELQSER        | 2  | SMC3  | 453  | KYYEVK        | 1 |
| SMC3  | 295  | QEQIKQR           | 5  | SMC1  | 300  | AKENTAHK      | 2 |
| SMC3  | 295  | QEQIKQR           | 5  | SMC3  | 304  | LELKAK        | 4 |
| SMC3  | 295  | QEQIKQR           | 5  | SMC3  | 302  | TKLELK        | 2 |
| SMC3  | 140  | QGKINQMATAPDSQR   | 3  | SMC3  | 155  | LKLLR         | 2 |
| SMC3  | 140  | QGKINQMoxATAPDSQR | 3  | SMC3  | 155  | LKLLR         | 2 |
| SA-2  | 461  | RDPEDDGILKR       | 10 | SA-2  | 456  | KLFSR         | 1 |
| SA-2  | 461  | RDPEDDGILKR       | 10 | SA-2  | 626  | LEKHLDALLR    | 3 |

|      |      |                                        |    |      |      |                |    |
|------|------|----------------------------------------|----|------|------|----------------|----|
| SMC3 | 838  | RLDQVEQELNELRETEG<br>GTVLTATTSELEAINKR | 33 | SMC3 | 872  | VKDTLAR        | 2  |
| SMC1 | 806  | RLEFENQKTR                             | 8  | SMC3 | 818  | IKLEGIITR      | 2  |
| SMC1 | 294  | RPQYIKAK                               | 6  | SMC3 | 872  | VKDTLAR        | 2  |
| SMC1 | 160  | SGELAQEYDKR                            | 10 | SMC1 | 171  | KKEMoxVK       | 2  |
| SMC1 | 160  | SGELAQEYDKR                            | 10 | SMC1 | 171  | KKEMVK         | 2  |
| SMC1 | 160  | SGELAQEYDKRK                           | 10 | SMC1 | 247  | EIDKDKKRMDR    | 4  |
| SMC1 | 160  | SGELAQEYDKRK                           | 10 | SMC1 | 172  | KEMoxVK        | 1  |
| SMC1 | 160  | SGELAQEYDKRK                           | 10 | SMC1 | 172  | KEMVK          | 1  |
| SMC1 | 734  | SKLESELANFGPR                          | 2  | SMC3 | 427  | EKNLEQYSK      | 2  |
| SMC1 | 734  | SKLESELANFGPR                          | 2  | SMC1 | 412  | KKVETEAK       | 2  |
| SMC1 | 968  | SSSLYAR                                | 5  | SMC3 | 236  | AKLDELSAK      | 2  |
| SMC3 | 12   | SYRDQTIVDPFSSKHNV<br>VGR               | 14 | SMC3 | 0    | MoxYIK         | 1  |
| SMC3 | 302  | TKLELKAK                               | 6  | SMC3 | 295  | QEQIKQR        | 5  |
| SMC3 | 827  | VETYLNENLR                             | 4  | SMC1 | 807  | LEFENQKTR      | 7  |
| SMC3 | 872  | VKDTLAR                                | 2  | SMC1 | 294  | RPQYIKAK       | 6  |
| SMC3 | 1099 | VSFTGKQGEMoxR                          | 6  | SMC1 | 62   | DLIHGAPVGKPNR  | 10 |
| SMC3 | 1099 | VSFTGKQGEMoxR                          | 6  | SMC1 | 57   | VKALR          | 2  |
| SMC3 | 1099 | VSFTGKQGEMR                            | 6  | SMC3 | 1046 | LVPGGKATLVMoxK | 6  |
| SMC3 | 166  | VYDERKEESISLMoxK                       | 6  | SMC3 | 155  | LKLLR          | 2  |
